# Supplementary material for: A new time-independent formulation of fractional release
Source: Copernicus journal article supplement (doi:10.5194/acp-2016-771), 2016-09-16
Supplement: Supplementary file [file acp-2016-771-AC1-supplement.pdf]

# Answers to the Referees

January 13, 2017

We would like to thank both reviewers for their comments on the paper. We have largely followed the suggestion of the reviewers, which has resulted in major changes of the manuscript. These changes are detailed below. Regarding the structure of the manuscript, the major changes are that the discussion on what should lead to changes in FRF (changes in stratospheric transport or photochemistry) and what should not lead to changes in FRF (trends in tropospheric mixing ratios) has been detailed and that the last part of the former Sect. 2 has partly been included in the introduction and partly been deleted (as it was confusing). Also the discussion of how a chemically active tracer propagates into the stratosphere has now been concentrated in Sect. 5 (and been removed from Sect. 2).

In addition to the changes motivated by the comments of the reviewers, we have implemented a few changes which occurred during the revision. The major changes directly due to reviewer comments are as follows:

- In the introduction we revised the paragraph on mean age of air in the following way: *"In brief this concept of mean age of the air (Hall and Plumb, 1994; Waugh and Hall, 2002) relies on the idea that different transport pathways (and associated transit times) contribute to the chemical composition of an air parcel at a given point in the stratosphere. Different transit times associated to these different transport pathways have different probabilities, which are described by a probability density function (pdf) also known as age spectrum. By folding the probability distribution for a certain entry time into the stratosphere with the time series of the inert trace gas, its mixing ratio at this point in the stratosphere can be derived, as long as there is no chemical loss. The transit time distribution is called the age spectrum  $G$  and the first moment (the arithmetic mean) is called mean age  $\Gamma$ . Plumb et al. (1999) showed that this concept is only valid to describe the propagation of inert tracers into the stratosphere. The underlying reason is that air parcels which have already spent a lot of time in the stratosphere, will only contribute very little to the observed mixing ratio of a compound which experiences photochemical loss, as a large fraction of the molecules of this compound will not be in the organic form anymore. Air parcels with long transit times thus need to be weighted less heavily than air parcels with short transit times."*
- In Sect. 2 we give a more detailed explanation of the entry mixing ratio and describe that it includes transport but not the chemical depletion on the transport pathway (a representation of the entry mixing ratio including chemical loss will then be derived in Sect. 5): *"In this representation of the entry mixing ratio the transport of the species to a certain location in the stratosphere is represented by  $G$ . It takes into account that several transit times and pathways are possible which is an improvement compared to the representation of the entry mixing ratio according to Eq. (2) where only a single transit time is allowed for. Nevertheless, Eq. (5) is only valid for chemically inert species and does not take respect to chemical processes."*
- In the discussion (Sect. 7) we added a paragraph on the discrepancies of FRFs deduced from observations: *"This [strong tropospheric trends] may lead to discrepancies in fractional release factors derived during different time periods. Such differences in FRF have been observed between the work of Laube et al. (2013) and Newman et al. (2007). The FRF values derived by Laube et al. (2013) were lower than those derived by Newman et al. (2007) on the 3 year mean age isosurface. As the tropospheric trends were lower during the observations used by Laube et al. (2013), it is expected that the re-calculation using our method should even increase the observed difference. We therefore conclude that the calculation of mean age may be the reason for the observed discrepancies, as suggested by Laube et al. (2013)."*

# Reply to Referee #1

## General comment

*A new definition of the fractional release factor (FRF) is proposed. It takes into account the fact that chemical loss during transport changes the weighting of different transit times. Consequently, a slightly changed definition of the reference tracer is proposed to quantify chemical loss in the stratosphere. The biggest advantage of the new FRF is that it removes some undesirable dependence on the trends of the considered species. This fact is validated with the model where halocarbons with idealized sources without trends as well as with realistic sources and trends are implemented. This important contribution is supported by well-performed figures. However, the way of explaining this approach has to be improved (see major point). Also the disadvantages of the new definition (the reference tracer is difficult to understand) are not discussed. I think that the very experienced co-authors could help to do this job. The paper may be acceptable after a major revision improving these points.*

We thank Referee #1 for the helpful comments, suggestions and the summary of the manuscript. We agree that the Section on the calculation methods of FRF can be improved and that it might be complicated to understand the physical meaning of our new formulation. Therefore we revised the introduction, Sect. 2 as well as Sect. 5 to give a better representation of the formalism. We also enlarged the discussion section where we respond to the disadvantages of the new definition. A detailed description of the changes in the manuscript is given according to the major and minor points (see below).

## Major points

All definitions of the fractional release factors  $f$  (FRF) have the form

$$f = \frac{R - \chi}{R} \quad (0.1)$$

with  $R$  being a kind of reference and  $\chi$  denoting the mixing ratio of the considered species. All quantities are space-time functions, i.e. of  $(r, t)$ .

The first possible choice for the reference function  $R$  is (your relations (1) and (2) following Salomon and Albritton, 1992):

$$R(r, t) = \chi_E(t - \Gamma(r, t)) \quad (0.2)$$

with  $\chi_E(t) = \chi(r = r_E, t)$  where  $r_E$  means the entry point like the tropical tropopause. However, to simplify arguments I would recommend to use the Earth's surface where trends of all relevant species are known. The second possible choice according to Newman et al., 2007 is (your eq. (8)):

$$R(r, t) = \int_0^\infty \chi_E(r, t - \tau) G(r, t, \tau) d\tau. \quad (0.3)$$

Note that (3) reduces to (2) only for a linear tracer (Hall 1994). Furthermore, definition (2) is very simple to use because only the knowledge of the mean age  $\Gamma$  is necessary.

The third choice is your relation (19), i.e.:

$$R(r, t) = \int_0^\infty \chi_E(t - \tau) G_N^*(r, t, t - \tau) d\tau. \quad (0.4)$$

Even if you get much better agreement with your idealized species without any trends, the interpretation of (4) is much less clear than for (2) and (3). The reference functions (2) and (3) can be understood as passively transported "reference species". This type of interpretation is much more difficult for definition (4).

My main criticism is that it is very difficult to get a clear picture what you did. I would recommend to rewrite both introduction and section 2. Even if I am familiar with the concept of age spectrum it was difficult for me to follow your arguments (and your notation).

Thank you for this nice overview of the formalism. It depends on the choice of the entry mixing ratio  $\chi_{entry}$  (your reference function  $R$ ) how the formulation of FRF changes. Thus it is the gist of this paper to find a proper representation of  $\chi_{entry}$ . We decided to keep to the term "entry mixing ratio" because we think that it is more striking. We agree that the physical meaning of Eq. (0.4) is less

intuitive than for Eq. (0.2) and (0.3). Therefore we expanded the discussion and interpretation of Eq. (0.4) in Sect. 5 (please also see the answer on your minor point No. 13).

Furthermore we revised the introduction of the article and expanded the description of steady state values and ODP therein. The discussion on inconsistencies of observed FRFs was moved from Sect. 2 to the introduction as we think it fits much better in this context. In addition, we explained the problems in the currently used formulation (Newman et al., 2007) in more detail which originates in the fact that the propagation of a chemically active species is treated as for an inert species.

We also reformulated Sect. 2 according to the recommendations of the referees. The discussion on the calculation of the stratospheric and the entry mixing ratio is now moved to Sect. 5 (also see comment 13 of Referee #2). In Sect. 2 we now only discuss the classical and the current formulation of FRF and state that it includes transport but no chemical loss processes which is inappropriate for chemically active species. Based on that issue we start/construct the derivation of the new formulation in Sect. 5.

Sect. 6 was complemented by a more detailed description of the applied arrival time distribution  $G_N^*$  which is an inverse Gaussian distribution with the parameters  $\Gamma^*$  and  $\Delta^*$ . *"We choose  $G_N^*$  to have the same shape as  $G$ , i.e. an inverse Gaussian distribution but with the parameters  $\Gamma^*$  (first moment) and  $\Delta^*$  (second moment), so that  $G_N^* = G(\Gamma^*, \Delta^*, t')$ . Like for  $G$  we use a constant ratio of the squared width to mean age of  $\Delta^{*2}/\Gamma^* = 0.7 \text{ yr.}$ "*

In the discussion (Sect. 7) we added a paragraph on the disadvantages of the new formulation: *"We also acknowledge that the new formulation is less intuitive than the formulation used by Newman et al. (2007) and Laube et al. (2013). However, as we have shown that the method used by Laube et al. (2013) and Newman et al. (2007) yields values which are strongly influenced by the tropospheric trend, this loss of intuitivity and the added dependence on model information is necessary, as much more representative values are derived."*

In addition, we also give a short sensitivity study on the importance of the lifetime that needs to be assumed in the calculation of the mean arrival time  $\Gamma^*$ . *"The parameterisation given by Plumb et al. (1999) depends on the stratospheric lifetime of the species. As fractional release also depends on the lifetime, one may argue that there is a certain circular argumentation involved. Indeed, if the assumption on stratospheric lifetime is very far off, and tropospheric trends are large then our new method will also fail in correcting for the tropospheric trend. However, it should be noted that the calculation is not extremely sensitive to the assumed lifetime. We investigated the sensitivity for a CFC-12 like tracer with a linearly increasing trend of 5 % per year. For an assumed steady state FRF of 0.5 at a mean age of 4 years using our method, a value of 0.5 is found with a deviation of 0.5 % for an uncertainty in the assumed lifetime of 20 %. Using the current method ignoring the effect of chemical loss would result in an FRF of 0.45, i.e. 10 % lower than the correct value. The sensitivity to the assumed lifetime is thus rather small."*

## Minor points

### 1. Abstract and Introduction

*"steady state" - This is one of the central concepts related to the FRFs. FRFs should be independent of time even if the emissions have a trend and the dynamics (Brewer-Dobson circulation) is changing. You should more carefully introduce this concept. E.g. it is important to explain that the effect of changing dynamics cannot be removed and the effect of changing emissions should be removed and why it is so difficult to do it. All the definitions of  $R$  as a ratio remove the dependence on emissions, or not ?. If not why ?*

FRFs should be independent of tropospheric trends but not of changes in the stratospheric conditions. This means that FRF is expected to change if e.g dynamics or the photochemistry changes. The purpose of our article is to find a new formulation of FRF that does not depend on tropospheric trends. Our formulation cannot (and does not want to) remove changes due to modified stratospheric dynamics. We go into details on the discussion about steady-state quantities in the introduction where we explain why FRF should be a time-independent quantity. In the revised text we added *"FRF should thus be specific for a given molecule and a given atmospheric condition. If atmospheric conditions, e.g. stratospheric dynamics or the actinic flux responsible for photochemical degradation, change, FRF is expected to change. However, FRF should not be dependent on the tropospheric trend of the chemical compound under otherwise unchanged atmospheric conditions."*

In Sect. 2 we discuss the influence of tropospheric trends on the calculation of the entry mixing

ratio (your reference function  $R$ ) which is the crucial variable in the calculation of FRF. In Sect. 2 we thus added *"In case of a chemical compound which is in steady state between emissions into the atmosphere and atmospheric loss the tropospheric trend will be zero and  $\chi_{\text{entry}}$  will just be its tropospheric mixing ratio. However, if the tropospheric mixing ratio of the trace gas changes with time,  $\chi_{\text{entry}}$  must be calculated based on assumptions about stratospheric transport. As most ozone depleting substances are not in steady state but have tropospheric trends, this needs to be taken into account in calculating the entry mixing ratio  $\chi_{\text{entry}}$ . It is through the calculation of  $\chi_{\text{entry}}$  that the time independence of FRF should be achieved."*

2. Abstract (L. 5)

*"for a given atmospheric situation" - do not understand what you want to say in context of "steady state"*

We moved the discussion on that into the introduction. The "atmospheric situation" or "atmospheric condition" is the interplay between different atmospheric processes like dynamics, radiation and photochemistry. Please also see the comment to point No. 1.

3. Abstract (L. 8)

*"current formulation" - it is difficult to understand without reading the paper what you mean here*

The term was changed to "widely used formulation" in the abstract as to avoid citations therein. In the introduction and Sect. 2 we explain that the "current formulation" is the calculation method of FRF given by Newman et al. (2007) and applied e.g. by Laube et al. (2010,2013). After introducing the relevant equation we stated: *"Subsequently we will refer to Eq. (6) as the "current formulation of FRF" as it has been used in Newman et al. (2007); Laube et al. (2013)."*

4. Abstract (L. 8)

*"tropospheric trends" - difficult to understand, maybe "trend in the emissions"*

Using the term "tropospheric trends" we mean the trends in the tropospheric mixing ratios and not in the emissions. Thus we changed the term to *"trends in the tropospheric mixing ratios"* in the abstract.

There is a difference between the trend in the emissions and in the mixing ratio: the tropospheric mixing ratios are influenced by the balance between the emissions and loss processes. A reduction of the emissions (e.g. due to the Montreal Protocol) does not instantaneously lead to a reduction in the mixing ratios when the removal processes are unchanged. Thus the trend in the emissions does not coincide with the trend in the mixing ratios which we denote as the "tropospheric trend".

5. Abstract (L. 10)

*"reduces the time-dependence in correlations" - even after reading the paper I do not understand what you mean here. For me "reduces the time-dependence in FRFs" would be enough.*

The "time-dependence in correlations" relates to the work of Plumb et al. (1999) who developed a method to reduce the time-dependence in the correlations between two tracers with stratospheric loss and strongly changing tropospheric abundances. The reference (Plumb et al., 1999) was removed from the abstract of a former version of the manuscript. We agree that this might be confusing and changed the sentence according to the referees suggestion. *"Taking into account chemical loss in the calculation of stratospheric mixing ratios reduces the time-dependence in FRFs."*

6. Introduction (P. 1, L. 20)

*...which intensify ozone destruction. (sounds better for me)*

We agree to the reviewer, changed the sentence and also added a reference: *"The gases are emitted in the troposphere, where many of them are nearly inert before they enter the stratosphere at the tropical tropopause. In the stratosphere, many of the molecules will be broken down photochemically and release halogen radicals that intensify ozone destruction (Solomon, 1990)."*

7. Introduction (P. 2, L. 3)

*...when the ODS are completely depleted.*

We adopt the suggestion of the Referee and completed the sentence in the following way *"The FRF increases until it reaches the value of 1 when the ODS is completely depleted and all halogen atoms it contained have been released."*

8. *Introduction (P. 2, L 14) "tropospheric trends": I would recommend to use "trends in the emissions" instead of "tropospheric trends" that does not sound very clear to me. Here is also the place where the concept of "steady state" should be explained in all details (see my first minor comment)*

There is a difference in the "trend in the emissions" and "the tropospheric trend" used here. What we used is the trend in the tropospheric mixing ratios. In case of a steady state between the emissions and atmospheric loss, the tropospheric mixing ratio corresponds to the entry mixing ratio needed to calculate FRF according to Eq. (0.1). Otherwise, the entry mixing ratio needs to be calculated from the convolution of the tropospheric time series and the transit time distribution. Please also see the answer on comment No. 4.

We added a more distinct explanation of what we mean by the term "tropospheric trend" in the introduction: *"However, FRF should not be dependent on the trend in the tropospheric mixing ratios of the chemical compound (tropospheric trend) under otherwise unchanged atmospheric conditions."*

9. *Introduction (P. 2, L 18)*

*"current formulation" - please explain it more detailed (widely used method of calculation, especially for the calculation of ODS (citations...))*

We added the citation of Newman et al. (2007) after the first use of the term "current formulation" in the introduction of the manuscript. In Sect. 2 we then introduce the different formulations of FRF which differ in the calculation of the entry mixing ratio  $\chi_{entry}$ . In this section we present the formulations given by Solomon and Albritton (1992) ("first formulation") as well as Newman et al. (2007) which we call the "current formulation" as it is the most recent definition of FRF. Please also see comment on point No. 3.

10. *Introduction (P. 2, L 32)*

*It is purpose of this paper to find a steady state formulation... - here you can see, how important is it to understand first why steady state formulation is so important*

We deleted this particular sentence in the revised version but deepened the discussion on steady state in the introduction as explained in the comments on point 1 and 2.

11. *Section 2*

*I would recommend, to reformulate following my "major point"*

We revised Sect. 2 where we now only present the general definition of FRF and the formulation of the entry mixing ratio given by Solomon and Albritton (1992) (Eq. (0.2)) as well as by Newman et al. (2007) (Eq. (0.3)). We removed the formalism which shows the problems of the currently used formulation from Sect. 2 as it seems to be more suitable in Sect. 5, which was also suggested by Referee #2. The derivation of the new entry mixing ratio (Eq. (0.4)) remained in Sect. 5 as it is part of our new formulation of FRF.

12. *Section 3*

*Starting from here, paper really improves*

*Thank you.*

13. *General question*

*Following your procedure, you significantly reduce the time dependence of the FRF calculated with realistic emissions. However, it seems to be like a "magic effect" without any deeper explanation why it works. Including chemistry into the age spectrum calculation is a formal step, but once again, all definitions of FRFs which are relative definitions (see my major point) should be independent on the trends of emissions.*

The reviewer is correct, a detailed physical interpretation of our new formulation was missed in the manuscript. That might be the reason why the improvement of the new formulation and the good agreement of the realistic and the idealized tracers seems surprising. The reason for the

deficient results of the current formulation is that the propagation of a chemically active tracer is treated as for an inert tracer.

Therefor we explicitly added a discussion on the new entry mixing ratio in Sect. 5. In the revised version, we added the following explanation: *"Using  $G_N^*$  instead of  $G$  results in a lesser weighting of the tail of the transit time distribution which is reasonable, especially for CAS with short lifetimes. A shorter-lived species is almost completely depleted after a transit time of e.g. 4 years thus this transit time  $t'$  should not contribute in the convolution with the tropospheric time series when calculating the remaining organic fraction. For such shorter lived species the remaining amount in the original organic form is thus hardly influenced by the tropospheric mixing ratios of air which entered a long time ago (the "tail" of the age spectrum for an inert trace gas). The shorter lived the trace gas is, the more the weighting needs to be shifted to the short fraction of the age spectrum. The arrival time distribution describes the relevant weighting of the different transit times and is specific for each trace gas."*

## Reply to Referee #2

### General comment

*This is an interesting paper that promises an improved method to compute fraction release factors (FRF). It includes results that suggest great promise but as presently written it does not make a convincing case. The paper is unclear and confusing in its derivations, which are at the heart of the paper. In addition, it makes exaggerated claims as to the expected properties of FRFs (e. g., their time-independence). Thus, I cannot recommend publication in ACP without major revisions.*

Both reviewers seem to have had problems to understand our argumentation. We believe that the main problem is the presentation, as none of the reviewers has identified a mistake in our new formulation (see also answer to point 4 of Referee #2). We have significantly changed the presentation according to the suggestions of the reviewers and believe that the presentation is now much clearer.

### Specific Comments

1. P3 L1-2:

*It is expected (even if undesired) that ODPs can change with time so not all time variation in the FRFs is incorrect. So a bit more discussion of this point is needed.*

In the revised introduction and Sect. 2 we put emphasis on the differentiation between temporal changes in FRFs (and ODPs, respectively) due to tropospheric trends and due to changes in the dynamics or chemistry. If e.g. the stratospheric circulation changes, the FRFs are also expected to change. But the calculated FRFs should be independent of tropospheric trends. We explained this issue in the following paragraph: *"FRF thus describes the effectiveness with which a certain ODS is broken down in the stratosphere. For the same time spent in the stratosphere, shorter lived species will have higher FRF than longer lived molecules. FRF are therefore used in the calculation of the Ozone Depletion Potential (ODP), a quantity which describes how effective a certain chemical is at destroying stratospheric ozone (Solomon et al., 1992). FRF should thus be specific for a given molecule and a given atmospheric condition. If atmospheric conditions, e.g. stratospheric dynamics or the actinic flux responsible for photochemical degradation, change, FRF is expected to change. However, FRF should not be dependent on the trend in the tropospheric mixing ratios of the chemical compound (tropospheric trend) under otherwise unchanged atmospheric conditions."*

In Sect. 4 we also added a paragraph on the discussion of Fig. 3. We discuss the difference between the changes of FRF due to changing dynamics and chemistry and the change due to tropospheric trends. Because the idealized tracer is free from tropospheric trends, the change must be caused by changes in dynamics or chemistry. The change of FRF derived from the realistic tracers is influenced both by circulation changes as well as changes due to tropospheric trends. This variation is about one order of magnitude bigger than the variation solely caused by changes in circulation. *"It is obvious from Fig. 3 that the changes in FRF calculated for the realistic tracers are much larger than for the idealized tracers. The variation in the idealized tracers reflects the changes due to changing chemistry and dynamics. As the only difference between the idealized and the realistic tracers is the tropospheric trend of the realistic tracers, the larger variability of FRF for the realistic tracers must be due to the way that the tropospheric trend is considered in the calculation of FRF according to the current formulation."*

2. P4 L3:

*Do you mean Newman et al. (2007) here?*

Thank you, we changed the reference to Newman et al. (2007).

3. P4 eq (5):

*Should be  $G(r, t_0)$  here.*

Done. In our notation with transit time  $t'$ :  $G(r, t')$

4. P4 L11-23:

*I find this "derivation" sloppy, misleading, and possibly incorrect. The  $f(t)$  defined in eq (1) is a function of time (i.e., model time). The  $f(t_0)$  in eq (6) is a function of transit time. These*



are completely different and cannot be replaced by each other. You should write the  $f$  in eq (6) as  $f(r, t, t_0)$  and it would be better to use a new function name as well.  $f^*$  may fit in well with your later discussion.

However, I strongly feel that L11-19 should just be removed from this section and fleshed out in more detail in section 5. Eq (8) is trivial to derive from eq (1) and (5) and without more discussion your alternative derivation is just confuses the matter. For example, why would  $f(r, t, t_0)$  be independent of transit time  $t_0$ ? Clearly it should be strongly dependent on transit time. But you confuse the matter by saying just "time" on L18 and thus make it seem you are talking about model time, which are completely unrelated.

While we admit that the explanation of the derivation of the new formulation of FRF may have been poorly explained, we do not agree that it is sloppy or even could be possibly wrong. In particular this latter point (possibly wrong) is not explained by the reviewer. We suspect that this perception may have been caused by the way we presented the new formulation. This has been improved, as also explained in the answers to Referee #1.

We agree to the referee that the discussion on Eq. (6) should be part of Sect. 5 rather than Sect. 2. Thus we removed the equations on the stratospheric mixing ratio  $\chi_{strat}$  (Eq. (6) and (7)) from Sect. 2 and included them into the derivation of the new formulation (Sect. 5). In the revised version of Sect. 2 we now only present the general formulation of FRF (Eq. (1)) and show two possible choices for the entry mixing ratio  $\chi_{entry}$  according to Solomon and Albritton (1992) and Newman et al. (2007). On this basis we deduce the "current formulation" of FRF (Eq. (8)). As FRF should not depend on tropospheric trends, we make the assumption that  $f$  does not depend on time  $t$  (thus  $f = f(r)$ ), as long as there are no changes in stratospheric transport (also see our answer to point No.1). We expressed this as follows: *"As explained above, FRF should be independent of the tropospheric trend of the species, but is expected to change if atmospheric conditions, especially stratospheric dynamics or photochemistry change. For the discussion of the different methods of calculating FRF, we assume that stratospheric transport is stationary in time, i.e. that the average circulation does not change with time. Under this assumption of unchanged stratospheric transport, the fractional release factor  $f(r, t)$  should not change with time, and thus be  $f(r)$ , independent of  $t$ ."*

In Sect. 2 we also expanded the description of transit times and the distinction between  $t$  (time) and  $t'$  (transit time): *"Note that in the following we will use  $t$  to denote time, whereas transit time (i.e. the time of a fluid element spent in the stratosphere) is denoted as  $t'$ . The distribution of the probabilities of the different transit times is called the age spectrum. It is denoted  $G$ . Assuming that the average stratospheric transport is stationary in time (i.e. no long term changes in stratospheric dynamics) the probability for a certain transit time  $t'$  will only be a function of the location in the stratosphere, thus  $G = G(r, t')$ . In particular the age spectrum will then only depend on the location  $r$  in the stratosphere and is not a function of time  $t$ . For simplicity, we will make this assumption of unchanged dynamics in the following, as FRF at a given location should be unchanged as long as the stratospheric transport is unchanged."*

In Sect. 5 we show the problems/ controversy in the current formulation of FRF pointing out that  $f$  is a function of the location  $r$  as well as transit time  $t'$  (which is ignored in the current formulation of FRF). This is reasonable as air parcels with long transit times certainly suffered a stronger chemical degradation than air parcels with short transit times. We added: *"This fraction  $f$  will be a function of the transit pathway and the transit time  $t'$ . For simplification, we assume that longer transit pathways will be linked with more chemical loss and longer transit times, thus we consider  $f$  to be a function of  $t'$  and location  $r$  only."*

As  $f$  is a function of transit time  $t'$  it cannot be extracted from the integral in Eq. (6) (stratospheric mixing ratio). On this basis we develop the new definition of FRF by introducing the new arrival time distribution  $G^*$  which includes chemical loss (by  $f = f(r, t')$ ). We decided to keep to the denotation of  $\bar{f}$  as it represents an arithmetic mean fractional release value.

A discussion on the new entry mixing ratio follows *"The entry mixing ratio in this new formulation now takes into account transport as well as chemical loss processes. Using  $G_N^*$  instead of  $G$  results in a lesser weighting of the tail of the transit time distribution which is reasonable, especially for CAS with short lifetimes. A short-lived species is almost completely depleted after a transit time of e.g. 4 years thus this transit time  $t'$  should not contribute in the convolution with the tropospheric time series. For such shorter lived species the remaining amount in the original organic form is*



*thus hardly influenced by the tropospheric mixing ratios of air which entered a long time ago (the "tail" of the age spectrum for an inert trace gas). The shorter lived the trace gas is, the more the weighting needs to be shifted to the short fraction of the age spectrum. The arrival time distribution describes the relevant weighting of the different transit times and is specific for each trace gas."*

5. P4 eq (8):

*Should be  $f(r,t)$  on the left side of equation.*

FRF should be independent of time  $t$  but it depends on transit time  $t'$ . Thus it should be  $f(r,t')$  (please also see the reply to your point No. 4).

6. P5 L2-3:

*You changed the meaning of the sentence in the Laube et al. paper. The full sentence is "Experimentally derived correlations of FRFs with mean age of air should thus only be considered as time-independent as long as there are no major changes in stratospheric transport or relative tropospheric growth rates." Seems reasonable enough. Not being time-independent is expected (e.g., from circulation changes) and does not render the concept invalid. This is not to say that all sources of time-dependence are ok, but just that a more nuanced discussion is needed.*

FRFs are expected to change if e.g. stratospheric transport changes but it should not change due to changes in the tropospheric growth rates. We removed the citation of Laube et al. (2013) from the manuscript and also moved the discussion on the discrepancies in the observations from Sect. 2 into the introduction. Therein we now discuss possible reasons for the differences in the observations. It is likely that the differences originate in an insufficient correction of the tropospheric trends as observations took place in times when the trends in the tropospheric mixing ratios were very strong. *"In recent years, inconsistencies between FRF values derived from independent observations at different times were identified (Laube et al, 2013; Carpenter et al., 2014). This could either be caused by real changes in FRF, due to changing atmospheric conditions, or by deficiencies in the way that the tropospheric trends are taken into account in the calculation of FRF. The latter is very likely, as data from different time periods are compared, where trends differ not only in magnitude but sometimes even in the direction (positive/ negative trend), suggesting possibly large impacts of the way that tropospheric trends are considered in the calculation of FRF."*

7. P5 L6-7:

*There is no such inherent assumption. One can derive eq (8) from eq (1) and (5).*

We wanted to show that it is vice versa: Eq. (1) can be derived from Eq. (6) under the assumption that  $f$  is independent of transit time  $t'$ . This discussion is now referred to Sect. 5 (also see our reply to point No. 4).

8. P5 L9-10:

*Again, this sentence is too absolute. Eq (8) is not expected to produce time-independent values (as stated many times already). The approach of eq (8) can only hope to remove time-dependence from source gas trends (which of course it may or may not).*

In the revision of Sect.2 this sentence was deleted, but the discussion on which changes should lead to changes in FRF has been expanded (also see reply to point No. 4).

9. P6 L9:

*You do not state how you compute the age of air. Please discuss.*

We added the description at the beginning of Sect. 4 where we discussed the correlations of FRF with age of air. *"In EMAC, the age of air is calculated from a diagnostic tracer. This tracer is nudged towards a linearly in time increasing mixing ratio at the lowest model layer."*

10. P6 L32:

*Mention you are starting to discuss figure 2. Took me a bit to figure out the change and figure 2 is never mentioned in the text.*

Thank you, we now refer to Fig. 2 in the text.

11. P7 L6-17:

*This discussion needs to be moved up to the beginning of the section or perhaps to Section 3 since it affects all of the calculations shown in this section.*

The reviewer is correct. In the beginning of Sect. 4 we discussed the correlations of FRF with mean age of air. For the calculation of FRF according to Eq. (8) it is necessary to know how the tropospheric time series  $\chi_{trop}$  and the transit time distribution  $G$  are computed and how the integral is being solved. We therefore moved the general description of the specific calculation method to the beginning of Sect. 4. We also added a paragraph on the matter that we did our analysis of the temporal evolution of FRF on age of air surfaces instead of space coordinates: *"Assuming that the age spectra for different locations with the same mean age are similar, we investigate changes of FRF in the model on age isosurfaces instead of on geographical coordinates. As mean age e.g. at a given location shows some variability with time, this is expected to lead to reduced variability."*

12. Section 4:

*I'd be interested in seeing the difference between eq (1) and (8), where in eq (1) a reasonable lag is used to account for the transit time. I get the feeling looking at your results that they may not be much worse using (1). I think this comparison should be added to the paper (it could be in a supplement).*

Eq. (1) is a general equation for the calculation of FRF. One needs to choose a representation of the entry mixing ratio to calculate FRF according to Eq. (1). Therefore Eq. (1) cannot simply be used to calculate FRF.

13. Section 5:

*This derivation seems awfully convoluted. Certainly it could be cleaned up. And it will help if you move and expand the discussion around eq (6) and (7) to here, as discussed above. And please explicitly state that  $f$  is a function of both  $t$  and  $t_0$ ,  $f(r, t, t_0)$ , so it is more clear what is going on.*

We revised the structure of Sect. 5 according to the referee. We agree that the break between the discussion in Sect. 2 and Sect. 5 might be confusing and not helpful to understand the concept. The derivation of the new formulation of FRF now starts with a general consideration of how the stratospheric mixing ratio of a CAS can be calculated (this previously was part of Sect. 2): *"The mixing ratio of a chemically active substance at some point  $r$  in the stratosphere at some time  $t$ ,  $\chi_{strat}(r, t)$ , can be calculated by convoluting three functions: the tropospheric time series  $\chi_{trop}(t - t')$ , the remaining fraction due to photochemical loss  $(1 - f(r, t'))$ , and the transit time distribution or age spectrum  $G(r, t')$ , which is a function of transit time  $t'$  and the location in the stratosphere  $r$ . As explained in Sect. 2,  $G$  and  $f$  are not functions of time  $t$  as stratospheric transport is assumed to be stationary in time."*

$$\chi_{strat}(r, t) = \int_0^{\infty} \chi_{trop}(t - t') (1 - f(r, t')) G(r, t') dt'$$

We also give an interpretation of the stratospheric mixing ratio: *"Physically Eq. (7) describes that the observed mixing ratio of a CAS will be the sum over the mixing ratios of the individual fluid elements with different transit times, different photochemical loss and different original mixing ratios upon entry into the stratosphere. For short lived species, the fluid elements with long transit times will contribute very little to the observed mixing ratio in the stratosphere, as the original content has been photochemically depleted. The tropospheric mixing ratio at that time is thus not very relevant for the observed mixing ratio. Imagine that a CAS has a decreasing trend in the troposphere and that its fractional loss will be nearly complete after a transit time of a 4 years. The observed mixing ratio on the 4 year iso agesurface will then be dominated by the short fraction of the transit time distribution, whereas longer transit times must be weighted less heavily. The probability density function describing how strongly which transit time and thus the corresponding tropospheric mixing ratio must be weighted should thus be different for species with different chemical loss and in particular also different for species with chemical loss then for species without chemical loss."*

Starting from here, we derive the new arrival time distribution  $G^*$  (which includes chemical loss) and by normalizing  $G^*$  we receive the expression

$$\bar{f}(r) \equiv \int_0^\infty f(r,t')G(r,t')dt' \quad \text{resp.} \quad \bar{f}(r) = \frac{\int_0^\infty \chi_{trop}(t-t')G_N^*(r,t')dt' - \chi_{strat}(r,t)}{\int_0^\infty \chi_{trop}(t-t')G_N^*(r,t')dt'}$$

which we interpret as the the mean fractional release: *"The new mean fractional release factor  $\bar{f}$  should be independent of tropospheric trends and is only expected to change if stratospheric transport or photochemistry change."*

A discussion on the new entry mixing ratio follows. Please also see our reply to your point No. 4.

14. P10 L1:

$\bar{f}(r)$  does not depend on  $t_0$  but it is not a constant.

This is correct, we changed the sentence to *" $\bar{f}$  does not depend on transit time  $t'$  and can thus be extracted from the integral"*.

15. P10 L21-23:

Now I'm confused. If you use the same function for  $G_N^*$  as  $G$ , then eq (8) and eq (19) are identical. Thus, you should reproduce the results in figure 3 in figure 4. What have you gained in the derivation?

$G_N^*$  and  $G$  have the same shape of an inverse Gaussian distribution with parameters  $\Gamma$  (first moment, mean age) and  $\Delta$  (second moment, width). But the functions  $G_N^*$  and  $G$  are not identical, they differ in their first moment and width. The first moment of the transit time distribution  $G$  is the mean age  $\Gamma$ . The concept is only valid for chemically inert species. Plumb et al. (1999) derived a parameterization of a species dependent "mean arrival time"  $\Gamma^*$  for chemically active species from a delta pulse emission calculation/ experiment. It takes into account that molecules with long arrival times travelled through regions with greater photochemical loss. In the beginning of Sect. 6 we added: *"We choose  $G_N^*$  to have the same shape as  $G$ , i.e. an inverse Gaussian distribution but with the parameters  $\Gamma^*$  (first moment) and  $\Delta^*$  (second moment), so that  $G_N^* = G(\Gamma^*, \Delta^*, t')$ . Like for  $G$  we use a constant ratio of the squared width to mean age of  $\Delta^{*2}/\Gamma^* = 0.7$  yr. Plumb et al. (1999) derived a parameterization of a species dependent "mean arrival time"  $\Gamma^*$  for a wide range of chemically active species from a delta pulse emission calculation.  $\Gamma^*$  can be calculated from the mean age of air  $\Gamma$  and the mean stratospheric lifetime  $\tau$  by a parameterization scheme Plumb et al. (1999)."*

16. P11 L4-5:

How are you using  $\Gamma^*$ ? This is not explained at all. Perhaps this is at the heart of my confusion on the last point. I'm suspecting that your definition of age differs in figure 3 and 4. More description is greatly needed.

This is correct, the definition of age differs in Fig. 3 and Fig. 4. In Fig. 3 we used the age of air  $\Gamma$  in the calculation of the age spectrum  $G = G(\Gamma)$  and with that in the calculation of the entry mixing ratio and FRF according to Eq. (5). In Fig. 4 instead, the FRF was calculated according to Eq. (19). The new arrival time distribution  $G_N^* = G(\Gamma^*)$  is used in this calculation, where  $\Gamma^*$  is the species dependent mean arrival time (Plumb et al., 1999). *"Using  $\Gamma^*$  instead of  $\Gamma$  takes respect to the chemical loss occurring on the transport pathways. We computed  $\Gamma^*$  for the considered species and applied it as the first moment of our new arrival time distribution  $G_N^*$ ."*

17. P11 L27-29:

Seems like these details should have been mentioned in Section 3.

We do not think that the description of the analyzed data (zonally averaged, monthly mean, latitude band) is part of the general model description (Sect. 3). We explained the considered model domain in Sect. 4, specifying the FRF in EMAC simulations. We think that a short description of the data should also be part of the summary.

On behalf of all authors,

Jennifer Ostermüller  
January 13, 2017

# A new time-independent formulation of fractional release

Jennifer Ostermüller<sup>1</sup>, Harald Bönisch<sup>2</sup>, Patrick Jöckel<sup>3</sup>, and Andreas Engel<sup>1</sup>

<sup>1</sup>Institute for Atmospheric and Environmental Sciences, Goethe University Frankfurt, 60438 Frankfurt, Germany

<sup>2</sup>Institute of Meteorology and Climate Research, Karlsruhe Institute of Technology, 76344 Karlsruhe, Germany

<sup>3</sup>Deutsches Zentrum für Luft- und Raumfahrt (DLR), Institut für Physik der Atmosphäre, Oberpfaffenhofen, Germany

*Correspondence to:* J. Ostermüller (ostermoeller@iau.uni-frankfurt.de)

**Abstract.** The fractional release factor (FRF) gives information on the amount of a halocarbon that is released at some point in the stratosphere from its source form to the inorganic form, which can harm the ozone layer through catalytic reactions. The quantity is of major importance because it directly affects the calculation of the Ozone Depletion Potential (ODP). To apply FRF in this context, steady-state values are needed, thus representing a molecular property for a given atmospheric situation. In particular, these values should be independent of the ~~tropospheric trends~~ trends in the tropospheric mixing ratios (tropospheric trends) of the respective halogenated trace gases.

We analyzed the temporal evolution of FRF from ECHAM/MESSy Atmospheric Chemistry (EMAC) model simulations for several halocarbons and nitrous oxide between 1965–2011 on different mean age levels and found that the ~~current~~ widely used formulation of FRF yields highly time-dependent values. We show that this is caused by the way that the tropospheric trend is handled in the ~~current~~ widely used calculation method of FRF.

Taking into account chemical loss in the calculation of stratospheric mixing ratios reduces the time-dependence in ~~correlations of different tracers~~ FRFs. Therefore we implemented a loss term in the formulation of FRF and applied the parameterization of a “mean arrival time” to our data set.

We find that the time-dependence in FRF can almost be compensated by applying a new trend correction in the calculation of FRF. We suggest that this new method should be used to calculate time-independent FRF, which can then be used e.g. for the calculation of ODP.

## 1 Introduction

~~Ozone depletion in the stratosphere is forced predominantly by chlorine~~ Chlorine and bromine-containing substances with anthropogenic sources have a strong influence on ozone depletion in the stratosphere. The gases are emitted ~~into~~ in the troposphere, where many of them are nearly inert before they enter the stratosphere at the tropical tropopause. In the stratosphere, many of the molecules will be ~~photochemically broken down~~ broken down photochemically and release halogen radicals that intensify ozone destruction ~~reactions~~ (Solomon, 1990).

The ~~amount~~ fraction of a halocarbon at some point in the stratosphere that is released from the organic (source) gas into the inorganic (reactive) form is quantified by its fractional release factor (FRF). The quantity was defined by Solomon et al. (1992) as “the fraction of the halocarbon species x injected into the stratosphere that has been dissociated”. It can be calculated by

comparing the original mixing ratio of a tracer that entered the stratosphere to the mixing ratio that is ~~still left~~ observed at some point in the stratosphere. The difference of ~~the this~~ entry mixing ratio and the stratospheric mixing ratio is equal to the ~~released~~ amount of the species released due to photochemical breakdown.

When entering the stratosphere at the tropical tropopause, ozone depleting substances (ODS) have a FRF that is ~~close to~~ zero.

- 5 As they follow the stratospheric circulation, the air parcels get distributed by different transport pathways and pass through their photochemical loss regions, where the molecules get dissociated. The FRF increases until it reaches the value of 1 when the ODS is completely depleted and all halogen atoms it contained have been released.

- FRF thus ~~depends on the location~~ describes the effectiveness with which a certain ODS is broken down in the stratosphere ~~and thus on the time the air mass has~~. For the same time spent in the stratosphere, ~~Fractional release is not only sensitive to transport~~  
10 ~~times but also to transport pathways. Once an air parcel has entered the stratosphere, it is distributed by the different branches of the Brewer-Dobson circulation (BDC). Depending on its transport pathway, it experiences different stages of chemical or photolytic loss. An air parcel that travels through the upper part of the stratosphere will suffer stronger photolytic degradation, especially in the tropics, than an air parcel in the lower stratosphere. In this way, the air parcel carries information on both chemical and transport processes via its FRF.~~

- 15 ~~FRF is commonly assumed to be a time-independent quantity, meaning that as long as transport and chemical processes do not change, FRF shows no change and in particular is independent of the tropospheric trend. This is a prerequisite e.g. for its application in the~~ shorter lived species will have higher FRF than longer lived molecules. FRF are therefore used in the calculation of the Ozone Depletion Potential (ODP), which is a steady state quantity, a quantity which describes how effective a certain chemical is at destroying stratospheric ozone (Solomon et al., 1992). FRF should thus be specific for a given molecule  
20 and a given atmospheric condition. If atmospheric conditions, e.g. stratospheric dynamics or the actinic flux responsible for photochemical degradation, change, FRF is expected to change. However, FRF should not be dependent on the trend in the tropospheric mixing ratios of the chemical compound (tropospheric trend) under otherwise unchanged atmospheric conditions.

For every tracer with changing tropospheric mixing ratios, we ~~need to consider~~ thus need to ensure that this trend ~~needs to be corrected for in the way that the FRF for a chemical~~ does not affect the FRF values derived from stratospheric observations.

- 25 The observed mixing ratio of a chemically active species (CAS) is calculated. As in the stratosphere is, however, influenced by its tropospheric trend and by chemical breakdown. Only the latter should contribute to the FRF. In the calculation of FRF the tropospheric trend thus needs to be taken into account and corrected for. As the different transit pathways contributing to the air parcel are associated with different transit times and different photochemical breakdown, the complex interplay between transport ~~and mixing~~, mixing and photochemistry needs to be described correctly for this purpose.

- 30 In recent years, inconsistencies between FRF values derived from independent observations at different times were identified (Laube et al., 2013; Carpenter et al., 2014). This could either be caused by real changes in FRF, due to changing atmospheric conditions, or by deficiencies in the way that the tropospheric trends are taken into account in the calculation of FRF. The latter is very likely, as data from different time periods are compared, where trends differ not only in magnitude but sometimes even in the direction (positive/ negative trend), suggesting possibly large impacts of the way that tropospheric trends are considered  
35 in the calculation of FRF.

In the current formulation for the calculation of FRF, ~~the transport of a CAS is (Newman et al., 2007), transport and mixing of chemically active species are~~ treated in a similar way as for chemically inert species, which are used to derive mean age of air. ~~However, Plumb et al. (1999) showed that the concepts are only valid for inert tracers, thus not for CAS. In particular, the~~ In brief this concept of mean age of the air (Hall and Plumb, 1994; Waugh and Hall, 2002) relies on the idea that different transport pathways (and associated transit times) contribute to the chemical composition of an air parcel at a given point in the stratosphere. Different transit times associated to these different transport pathways have different probabilities, which are described by a probability density function (pdf) also known as age spectrum. By folding the probability distribution for a certain entry time into the stratosphere with the time series of the inert trace gas, its mixing ratio at this point in the stratosphere can be derived, as long as there is no chemical loss. The transit time distribution is called the age spectrum  $G$  and the mean age of air first moment (the arithmetic mean) is called mean age  $\Gamma$  ~~only describe the transport of inert species.~~

For CAS, the chemical loss during the transport needs to be considered, which leads to a different weighting of different transit pathways and associated. Plumb et al. (1999) showed that this concept is only valid to describe the propagation of inert tracers into the stratosphere. The underlying reason is that air parcels which have already spent a lot of time in the stratosphere, will only contribute very little to the observed mixing ratio of a compound which experiences photochemical loss, as a large fraction of the molecules of this compound will not be in the organic form anymore. Air parcels with long transit times thus need to be weighted less heavily than air parcels with short transit times. Based on that finding, Plumb et al. (1999) introduced species dependent arrival time distributions (ATD) to characterize the propagation of tracers undergoing chemical loss and with changing tropospheric abundances. ~~This ATD gives less weight to long transit times as the CAS, which were originally in these air parcels, have been photochemically degraded and thus contribute to a lesser extent to the observable remaining fraction of the CAS.~~

Plumb et al. (1999) used a two dimensional model to calculate the species dependent mean arrival time  $\Gamma^*$ , which is the first moment of the species dependent ATD. ~~A parameterization of  $\Gamma^*$  was then derived, based on mean age and the stratospheric lifetime of the tracers. Plumb et al. (1999) They~~ showed that there is a large difference between  $\Gamma$  and  $\Gamma^*$ . ~~Using for CAS (in case of an inert tracer  $\Gamma = \Gamma^*$ ) and that by using  $\Gamma^*$  instead of  $\Gamma$  in the calculation of the stratospheric mixing ratio, a much better agreement between detrended correlations from different time periods was achieved it was possible to eliminate differences between correlations of different species observed at different times (and thus when tropospheric trends were different). Therefore it is likely that the differences in the the observed FRF could be influenced by the current calculation method which is based on mean age  $\Gamma$  and not on the mean arrival time  $\Gamma^*$ .~~

It is the purpose of this paper to find a steady state formulation for the FRF. This would allow the comparison of measurements from different dates. Especially in the late 1990s many tracers showed rapid changes in their tropospheric trend due to the decline of the substances induced by the regulations of the Montreal Protocol. Thus it is necessary to find a proper trend correction for the calculation of FRF values, which are used in the determination of the ODP and Effective Equivalent Stratospheric Chlorine (EESC).

In this paper, we first examine how strongly the FRF calculated using the current formulation is influenced by the tropospheric trend, using model calculations of FRF for some typical CAS. We show that the tropospheric trend has a significant impact on



FRF. We then present a new improved formulation to calculate FRF which removes the impact of tropospheric trends much better. In Sect. 2 we present the classical and current calculation methods of FRF. A description of the ECHAM/MESSy Atmospheric Chemistry (EMAC) model and the simulations follows in Sect. 3. We then calculate FRF with the model data (Sect. 4) and show that the current calculation method yields time-dependent values. In Sect. 5 we present derive a new formulation of FRF and give an overview of the results of based on the concept of arrival time distribution. In Sect. 6 we show that the new calculation method in Sect. 6 yields results with much reduced influence from tropospheric trends. In the last section we discuss our results.

## 2 Calculation methods of FRF

The quantity of FRF was first introduced by Solomon and Albritton (1992) as “the fraction of the halocarbon species  $x$  injected into the stratosphere that has been dissociated”. This can be expressed As explained above, FRF should be independent of the tropospheric trend of the species, but is expected to change if atmospheric conditions, especially stratospheric dynamics or photochemistry change. For the discussion of the different methods of calculating FRF, we assume that stratospheric transport is stationary in time, i.e. that the average circulation does not change with time. Under this assumption of unchanged stratospheric transport, the fractional release factor  $f(r, t)$  should not change with time, and thus be  $f(r)$ , independent of  $t$ .

The substance specific FRF can then be expressed in general by the following equation

$$f_i(r, t) = \frac{\chi_{i, \text{entry}} - \chi_{i, \text{strat}}(r, t)}{\chi_{i, \text{entry}}} \frac{\chi_{\text{entry}}(r, t) - \chi_{\text{strat}}(r, t)}{\chi_{\text{entry}}(r, t)}. \quad (1)$$

Herein,  $\chi_{i, \text{entry}}$  is the mixing ratio of an air parcel when it entered the stratosphere and  $\chi_{i, \text{strat}}(r, t)$  is the  $\chi_{\text{strat}}(r, t)$  is the observed mixing ratio at a certain location and time the location  $r$  and time  $t$  in the stratosphere. The latter This is an observable quantity and, as it can be measured from balloon or aircraft samples or from satellites. It is influenced by temporal trends in the troposphere, stratospheric loss, and transport and mixing in the stratosphere.  $\chi_{\text{entry}}$  is the representative average entry mixing ratio of an air parcel at location  $r$  and time  $t$ . Although both  $\chi_{\text{strat}}$  and  $\chi_{\text{entry}}$  depend on time,  $f$  should be a time-independent quantity thus only depend on the location in the stratosphere.

In the classical contrast to  $\chi_{\text{strat}}$ ,  $\chi_{\text{entry}}$  it is not an observable quantity but serves as a reference to describe the original mixing ratio of the CAS in the air parcel before photochemical breakdown. In case of a chemical compound which is in steady state between emissions into the atmosphere and atmospheric loss, the tropospheric trend will be zero and  $\chi_{\text{entry}}$  will just be its tropospheric mixing ratio. However, if the tropospheric mixing ratio of the trace gas changes with time,  $\chi_{\text{entry}}$  must be calculated based on assumptions about stratospheric transport. As most ozone depleting substances are not in steady state but have tropospheric trends, this needs to be taken into account in calculating the entry mixing ratio  $\chi_{\text{entry}}$ . It is through the calculation of  $\chi_{\text{entry}}$  that the time independence of FRF should be achieved.

In the first formulation of FRF suggested by Solomon and Albritton (1992), the entry mixing ratio is was calculated from the tropospheric time series by estimating the time lag of the tracer mixing ratios between the troposphere and the stratosphere

point  $r$  in the stratosphere based on mean age of air

$$\chi_{i,entry} = \chi_{i,trop} (t - \Gamma), \quad (2)$$

where  $\Gamma$  is the mean age of air, which is the mean time elapsed since the entry of an air parcel at the tropical tropopause (Vaugh and Hall, 2002; Hall and Plumb, 1994).

- 5 The concept of age of air (AOA) can be understood as follows: We consider a stratospheric air parcel that consists of infinitesimal fluid elements. ~~These are so small that they cannot exchange components with each other and are thus not influenced by mixing for all timescales of interest (Vaugh and Hall, 2002)~~ An air parcel at some point in the stratosphere will consist of a nearly infinite number of such fluid elements. When entering the stratosphere, the fluid elements get distributed by along different transport pathways. If we consider an air parcel at some location  $r$  in the stratosphere, it will contain a mixture of
- 10 fluid elements with longer and shorter transit times  $t'$  depending on the pathway they took. ~~The chemical composition of such an air parcel for a species whose mixing ratio changes with time in the troposphere is thus influenced by a distribution of transit times, the so-called age spectrum,  $G(r, t')$  rather than one single transit time (Hall and Plumb, 1994).~~ Note that in the following we will use  $t$  to denote time, whereas transit time (i.e. the time of a fluid element spent in the stratosphere) is denoted as  $t'$ . The distribution of the probabilities of the different transit times is called the age spectrum. It is denoted  $G$  describes the probability
- 15 of. Assuming that the average stratospheric transport is stationary in time (i.e. no long term changes in stratospheric dynamics) the probability for a certain transit time ~~since the entry into~~  $t'$  will only be a function of the location in the stratosphere, thus  $G = G(r, t')$ . In particular the age spectrum will then only depend on the location  $r$  in the stratosphere and is ~~thus influenced by net mass transport and mixing~~ not a function of time  $t$ . For simplicity, we will make this assumption of unchanged dynamics in the following, as FRF at a given location should be unchanged as long as the stratospheric transport is unchanged.
- 20 As the sum of the probabilities of all transit times must be unity, the integral of  $G(r, t')$  is ~~normalized so that~~ over all possible transit times must be 1:

$$\int_0^{\infty} G(r, t') dt' = 1 \quad (3)$$

and the arithmetic mean of the distribution can be calculated by its first moment and is called the mean age of air

$$\Gamma(r) = \int_0^{\infty} t' G(r, t') dt'. \quad (4)$$

- 25 Mean age is not a directly observable quantity but it can be deduced from observations of passive tracers like  $\text{CO}_2$  or  $\text{SF}_6$  (Schmidt and Khedim, 1991; Hall and Plumb, 1994; Strunk et al., 2000; Engel et al., 2009).

- ~~FRFs~~ As noted above, the photochemical breakdown of a chemical compound increases on average with the time the air parcel has spent in the stratosphere ( $t'$ ). FRFs thus show compact correlations with mean age of air  $\Gamma$ . ~~Newman et al. (2006)~~ Newman et al. (2007) presented FRF as a function of mean age including the age spectrum in the calculation of  $\chi_{entry}$ . In this
- 30 formulation, the entry mixing ratio ~~on a certain age isosurface for a certain mean age value~~ is calculated by the convolution of

the tropospheric time series with the age spectrum

$$\chi_{entry}(r, t) = \int_0^{\infty} \chi_{trop}(t - t') G(r, t') dt', \quad (5)$$

where  $\chi_{trop}(t - t')$  represents the tropospheric mixing ratio at time  $t - t'$ , thus  $t'$  before the observed date.

The entry mixing ratios calculated by Eq. date of observation. In this representation of the entry mixing ratio the transport of the species to a certain location in the stratosphere is represented by  $G$ . It takes into account that several transit times and pathways are possible which is an improvement compared to the representation of the entry mixing ratio according to Eq. (2) and Eq. where only a single transit time is allowed for. Nevertheless, Eq. (5) coincide, if the species mixing ratio does not depend on time, or in the case of the age spectrum being a delta function at  $t = \Gamma$ . In the latter case, the stratospheric transport would be without mixing and controlled by uniform advection of all fluid elements in the specific air parcel. is only valid for chemically inert species and does not take respect to chemical processes.

In general, a tracers stratospheric mixing ratio  $\chi_{strat}(r, t)$  can be formulated via its fractional release factor  $f$  if we consider that it is the remaining fraction of the tracer which is not yet dissociated. This fraction  $f$  will be a function of the transit pathway and the transit time  $t'$ . For simplification, we assume that longer transit pathways will be linked with more chemical loss and longer transit times, thus we consider  $f$  to be a function of  $t'$  only :

$$\chi_{strat}(r, t) = \int_0^{\infty} \chi_{trop}(t - t') (1 - f(t')) G(r, t') dt'.$$

In the case of an inert tracer,  $f(t') = 0$  for all possible transit times and transport pathways. Thus the loss term disappears and we again receive Inserting Eq. (5) into Eq. (1) yields

$$f(r) = \frac{\int_0^{\infty} \chi_{trop}(t - t') G(r, t') dt' - \chi_{strat}(r, t)}{\int_0^{\infty} \chi_{trop}(t - t') G(r, t') dt'}. \quad (6)$$

Subsequently we will refer to Eq. (6) as the “current formulation of FRF” as it has been used in Newman et al. (2007); Laube et al. (2013).

If one supposes that  $f$  does not depend on time, the factor  $(1 - f)$  can be extracted from the integral

$$\chi_{strat} = (1 - f) \int_0^{\infty} \chi_{trop}(t - t') G(r, t') dt'.$$

We then receive the following equation for the calculation of

Equations (1) and (6), respectively, yield a single fractional release factor  $f(r)$ . In a similar way to mean age, this must be interpreted as an average value, as of course the fractional release factor

$$f = \frac{\int_0^{\infty} \chi_{trop}(t - t') G(r, t') dt' - \chi_{strat}}{\int_0^{\infty} \chi_{trop}(t - t') G(r, t') dt'}.$$

This is the current representation of fractional release, as it is applied by Newman et al. (2007). Subsequently we will refer to it as the “current formulation” for the fluid elements of an air parcel will differ depending in particular on the time they have spent in the stratosphere, i.e. the transit time  $t'$ .

The stratospheric mixing ratio  $\chi_{strat}$  in Eq. (1) and Eq. (6) can be deduced from observations or from model data, as well as the tropospheric time series  $\chi_{trop}$ . The transit time distribution  $G$  can be parameterized according to Waugh and Hall (2002).

It was accepted so far that the formulation of the entry mixing ratio according to Eq. is an adequate correction for tropospheric trends. Laube et al. (2010) treated FRFs as a time-independent quantity at least “as long as the general stratospheric circulation and actinic flux spectrum are not changing”. Differences in FRF values from different measurement campaigns were attributed to vertical and latitudinal variabilities or could be influenced by uncertainties in the derivation of mean age.

In recent years inconsistencies were identified and it was found that FRF calculated by Eq. are not generally time-independent (Laube et al., 2013). The concept is only valid “as long as there are no major changes in stratospheric transport or relative tropospheric growth rates”.

In our opinion, a further explanation for the discrepancy between FRFs derived from different data sets could be the method how the entry mixing ratio was calculated, thus the correction for the tropospheric trend. In particular, the inherent assumption that  $f$  is independent of  $t'$ , which is needed to derive Eq. is certainly an oversimplification. Errors in this calculation will lead to differences in the FRF derived, especially if data from different time periods are compared, where trends differ in magnitude and sometimes even in the direction (positive/negative trend).

We therefore analyzed In order to test how well the current formulation can remove the effect of tropospheric trends in the calculation of FRF, we analysed the temporal evolution of FRF in model data to evaluate, whether the approach of Eq. really produces time-independent values using data from the EMAC model. The EMAC model and the related simulations will be presented in the next section before we show first results of the FRF calculations and the time dependences of FRF calculated using Eq. (6) will be discussed in Section 4.

### 3 The EMAC Model

The ECHAM/MESSy Atmospheric Chemistry (EMAC) model is a numerical chemistry and climate simulation system that includes submodels describing tropospheric and middle atmosphere processes and their interaction with oceans, land and human influences (Jöckel et al., 2006). It uses the second version of the Modular Earth Submodel System (MESSy2) to link multi-institutional computer codes. The core atmospheric model is the 5th generation European Centre Hamburg general circulation model (ECHAM5, Roeckner et al. (2006)). For the present study we applied EMAC (ECHAM5 version 5.3.02, MESSy version 2.51) in the T42L90MA-resolution, i.e. with a spherical truncation of T42 (corresponding to a quadratic Gaussian grid of approximately 2.8 by 2.8 degrees in latitude and longitude) with 90 vertical hybrid pressure levels up to 0.01 hPa.

### 3.1 Simulations

In this study we analyse a reference simulation performed by the Earth System Chemistry integrated Modelling (ESCiMo) initiative (Jöckel et al., 2016). The simulation RC1-base-07 is a free-running hindcast simulation from 1950 to 2011. It is forced by prescribed sea surface temperatures (SSTs) and sea ice concentrations (SICs) merged from satellite and in-situ observations.

5 The initialization of the simulation starts in January 1950 and is followed by a spin-up period of 10 years. Therefore we will analyze the data after 1965.

The model uses observed surface mixing ratios for boundary conditions that were taken from the Advanced Global Atmospheric Gases Experiment (AGAGE, <http://agage.eas.gatech.edu>) and the National Oceanic and Atmospheric Administration/Earth System Research Laboratory (NOAA/ESRL, <http://www.esrl.noaa.gov>).

10 An important point in the model set-up is the additional implementation of idealized tracers with mixing ratios relaxed to  $\chi_{trop} = 1$  ppt in the lowest model layer above the surface. These idealized tracers have no tropospheric trend but the chemical kinetics in the stratosphere follow the same mechanisms as for realistic tracers. However, there is no feedback of these tracers into the chemistry, radiation or dynamics of the model. For all tracers, the chemistry is controlled by the submodel MECCA (Module Efficiently Calculating the Chemistry of the Atmosphere, Sander et al. (2011)) and the photolysis rate coefficients are  
15 calculated by the submodel JVAL (Sander et al., 2014).

Idealized tracers with constant tropospheric mixing ratios have been implemented for the halocarbons CFC-11 ( $\text{CFCl}_3$ ), CFC-12 ( $\text{CF}_2\text{Cl}_2$ ), methyl chloroform ( $\text{CH}_3\text{CCl}_3$ ), Halon 1211 ( $\text{CF}_2\text{ClBr}$ ) and Halon 1301 ( $\text{CF}_3\text{Br}$ ), as well as for nitrous oxide ( $\text{N}_2\text{O}$ ).

A detailed description of ECHAM/MESSy development cycle 2 can be found in Jöckel et al. (2016), and references therein.

## 20 4 Time-dependence of FRF in EMAC simulations

FRFs are often analyzed as a function of mean age of air  $\Gamma$  (Schauffler et al., 2003). Figure 1 shows as an example In EMAC, the age of air is calculated from a diagnostic tracer. This tracer is nudged towards a linearly in time increasing mixing ratio at the lowest model layer.

To calculate FRFs according to the current formulation, we need to solve Eq. (6) and make some assumptions on the tropospheric time series and the shape of the age spectrum. For the calculation of the entry mixing ratio in the current FRF formulation (cf. Eq. (6)), Eq. (5) is integrated 30 years back in time. This is necessary to correct for the influence of the troposphere on the stratosphere. The tropospheric time series before 1950 can be taken from the RCP6.0 scenario (Meinshausen et al., 2011). For most of the tracers considered here, the mixing ratio before 1950 was close to zero, except for the nearly linearly increasing tracer nitrous oxide ( $\text{N}_2\text{O}$ ).  $\text{N}_2\text{O}$  has increased very slowly and nearly constantly by 0.8 ppb/yr  
25 over the past decades. The tropospheric mixing ratios of  $\text{N}_2\text{O}$  before 1950 are assumed to decrease by the same magnitude.

In this study we use an inverse Gaussian function for the transit time distribution  $G$  (Waugh and Hall, 2002; Schauffler et al., 2003) with a constant ratio of the squared width to mean age of  $\Delta^2/\Gamma = 0.7$  according to Hall and Plumb (1994) and as used in

previous studies (Engel et al., 2002; Bönisch et al., 2009). This parameterization can be used throughout most of the stratosphere, but varies between stratospheric models (Vaugh and Hall, 2002).

As an example, Fig. 1 shows the correlations of the FRF of nitrous oxide and methyl chloroform with mean age of air using monthly mean EMAC model data and the current calculation method (cf. Eq. (6)). The correlations are compact, but not time-independent. Especially for methyl chloroform there are large differences in the correlations depending on the year. This is a first hint that there is a time-dependence in the current representation of FRF.

There may be several reasons for this time-dependency. On the one hand, changes in the stratospheric circulation or chemistry could cause changes in ~~the correlations~~ fractional release on a given age-isosurface, on the other hand it is possible that the tropospheric trend of the species has an impact on the ~~correlations~~ derived fractional release factor.

In order to separate the two possible effects from each other, we make use of the idealized tracers described in Sect. 3.1. These tracers have nearly constant mixing ratios of 1 ppt throughout the troposphere, but in the stratosphere they experience the same transport and chemical depletion mechanisms as the realistic tracers. The FRF of the idealized tracers can easily be calculated by Eq. (1) with  $\chi_{i,entry} = 1$  ppt. FRF calculated by the idealized tracers gives a very good proxy of a quasi steady state value of FRF in the model. ~~We study the temporal behavior~~ Assuming that the age spectra for different locations with the same mean age are similar, we investigate changes of FRF in the model on age isosurfaces instead of on geographical coordinates. As mean age e.g. at a given location shows some variability with time, this is expected to lead to reduced variability.

We calculated the temporal evolution of zonal mean FRF values derived from monthly mean data on the constant mean age of air surfaces  $\Gamma = 2$  yr, 3 yr and 4 yr in the northern hemisphere mid-latitudes between  $32^\circ$  N and  $51^\circ$  N. In ~~this latitude band several observations were analyzed by Laube et al. (2013).~~ In order to avoid possible spin-up effects, the analysis is restricted to data after 1965. The temporal evolution of FRF calculated from the idealized tracers is shown in Fig. 2.

On older mean age of air surfaces we find higher FRF values, which is reasonable, because older air has had more time to travel through the photochemical loss regions than younger air. The value of FRF depends on the species and their photolytic lifetimes. CFC-12 ( $\text{CF}_2\text{Cl}_2$ ) and nitrous oxide ( $\text{N}_2\text{O}$ ) are long-lived with a similar stratospheric lifetime of 95.5 yr and 116 yr respectively (Ko et al., 2013). Even on the 4 yr age isosurface about half of the original amount remains in the organic form. In contrast, CFC-11 ( $\text{CFCl}_3$ ) and methyl chloroform ( $\text{CH}_3\text{CCl}_3$ ) are shorter-lived with stratospheric lifetimes of 57 yr and 37.7 yr respectively (Ko et al., 2013). These species are largely depleted on the 4 yr age isosurface with FRF values of around 0.8.

We notice a seasonality in FRF, which can be explained by seasonal variations in transport, chemistry and mixing. These are stronger in the upper stratosphere, due to shorter local lifetimes. Beside this, we can see that the FRFs for idealized tracers only slightly vary with time. The increase of FRF is in the order of about 5 % per decade, which is in agreement to Li et al. (2012), who analyzed changes in FRF in the Goddard Earth Observing System Chemistry-Climate Model (GEOSCCM). These changes are consistent with an ~~an~~-acceleration of the Brewer-Dobson Circulation due to climate change, which is found in EMAC calculations consistent with most other models (Butchart et al., 2010). A stronger circulation leads to a faster transport of air parcels to their loss regions and thus to an increased FRF on a given mean age level. Nevertheless, the FRF of the idealized tracers can be assumed to be a good proxy for a quasi steady state value in the model, as they are not influenced by tropospheric trends. ~~To analyze the realistic tracers (with tropospheric trend), we need to solve Eq. and make some assumptions on the~~

tropospheric time series and the shape of the age spectrum. Calculating the entry mixing ratio in the current FRF formulation, Eq. is integrated 30 years back in time. This is necessary to correct for the influence of the troposphere on the stratosphere. The tropospheric time series before 1950 can be taken from the RCP6.0 scenario (Meinshausen et al., 2011). For most of the considered tracers the mixing ratio before 1950 was close to zero, except for the nearly linearly increasing tracer nitrous oxide ( $\text{N}_2\text{O}$ ).  $\text{N}_2\text{O}$  is increasing very slowly and nearly constantly by 0.8 ppb/yr. The tropospheric mixing ratios of  $\text{N}_2\text{O}$  before 1950 are assumed to decrease by the same magnitude.

In this study we use an inverse Gaussian function for the transit time distribution  $G$  with a constant ratio of the squared width to mean age of  $\Delta^2/\Gamma = 0.7$  according to Hall and Plumb (1994) and as used in previous studies (Engel et al., 2002). This parameterization can be used throughout most of the stratosphere, but varies between stratospheric models (Waugh and Hall, 2002).

The temporal evolution of the FRF of the realistic tracers (with tropospheric trends) is analyzed on the same latitude band and AOA surfaces as for the idealized tracers. The results can be seen are shown in Fig. 3. The colored-coloured lines in Fig. 3 show the results of the FRF calculation for realistic tracers according to the current formulation. The results of the idealized tracers are plotted in solid black lines and the tropospheric trends are added by dashed black lines. It is obvious from Fig. 3 that the changes in FRF calculated for the realistic tracers are much larger than for the idealized tracers. The variation in the idealized tracers reflects the changes due to changing chemistry and dynamics. As the only difference between the idealized and the realistic tracers is the tropospheric trend of the realistic tracers, the larger variability of FRF for the realistic tracers must be due to the way that the tropospheric trend is considered in the calculation of FRF according to the current formulation.

We can divide the results for tracers with a weak and a strong tropospheric trend. The results differ depending on the magnitude and on the direction of the tropospheric trend.

For  $\text{N}_2\text{O}$ , which has a very small linear tropospheric trend of about only 0.2 %/yr, the realistic and the idealized tracer are in good agreement, which means that the current formulation of FRF works well as long as the trends are small.

The situation is different, if we consider the anthropogenically emitted chlorofluorocarbons and methyl chloroform, which had strong positive trends in the 1980s (growth rate 3.7 %/yr, Albritton et al. (1995) about 6 % for CFC-11 and CFC-12, 8.7 % for methyl chloroform (Gammon et al., 1985)) and phased out in the 1990s due to the Montreal Protocol. For those tracers, the FRF is strongly time-dependent and obviously depends on the tropospheric trends of the species deviates systematically from the FRF of the idealized tracers: In times of positive trends (before 1995), FRF is underestimated in comparison to the idealized tracer. For methyl chloroform, whose positive trend is followed by a strong negative trend since the middle of the 1990s, we notice that the FRF is overestimated during the period of the negative trend compared to the idealized tracer. The chlorofluorocarbons CFC-11 and CFC-12 have a much weaker negative trend since the mid 1990ies than methyl chloroform due to their longer stratospheric lifetimes. Here, we do not notice an overestimation of FRF during the negative trend period the FRF from the realistic and the idealized tracers are again in good agreement for the period with small trends.

To sum up, our model experiments show that the tropospheric trend influences the current FRF calculation and imposes a time-dependence. If trends are sufficiently small, as for  $\text{N}_2\text{O}$  or the CFCs in the 21<sup>st</sup> century, the effect of the tropospheric trend is well removed. During periods of strong positive trends in tropospheric mixing ratios, there is a low bias in the FRF derived using Eq. (6) in comparison to the idealized tracers. During periods of strong negative trends, as observed for  $\text{CH}_3\text{CCl}_3$  in the



early 21<sup>st</sup> century the FRF based on Eq. (6) is overestimated. This time-dependence could also explain the differences between FRF values deduced from measurements at different dates. If we for instance compare CFC-12 data on the 3 yr isosurface in 1980 and in 2000, there is an increase of about 50 % on the FRF value (see Fig. 3). The result of the calculation cannot be regarded as a steady state value and the possible change due to variations in the stratospheric circulation cannot explain this magnitude of the difference (see idealized tracers). Therefore, we conclude that it is caused by an incomplete correction of tropospheric trends and develop a new formulation of FRF in the following section.

## 5 A new formulation of FRF

As shown in Sect. 4, the currently used formulation to derive FRF does not correct for tropospheric trends in a satisfactory manner. In this Section we will show a possible reason and solution to this issue.

We consider the propagation of a CAS with solely tropospheric sources into the stratosphere. Air parcels enter the stratosphere at the tropical tropopause. In the stratosphere, the CAS gets distributed by the meridional overturning circulation (Brewer-Dobson circulation), which includes residual circulation and mixing. During this transport in a similar way as for an inert tracer. In addition, the CAS will also be chemically depleted by sunlight or radicals during the transport. The mixing ratio of the CAS at a certain location in the stratosphere is thus influenced by different factors like the temporal trend in the troposphere, transport and mixing in the stratosphere, as well as loss processes. As in Sect. 2, we again make the assumption of stationary stratospheric transport, i.e. we derive a formulation of FRF which should be constant as long as stratospheric transport (and radiation) is unchanged.

The effect of transport is described by In general, a tracers stratospheric mixing ratio  $\chi_{strat}(r, t)$  can be formulated via its fractional release factor  $f$  if we consider that it is the remaining fraction of the tracer which is not yet dissociated. This fraction  $f$  will be a function of the transit pathway and the transit time  $t'$ . For simplification, we assume that longer transit pathways will be linked with more chemical loss and longer transit times, thus we consider  $f$  to be a function of  $t'$  and location  $r$  only.

The mixing ratio of a chemically active substance at some point  $r$  in the stratosphere at some time  $t$ ,  $\chi_{strat}(r, t)$ , can be calculated by convoluting three functions: the tropospheric time series  $\chi_{trop}(t - t')$ , the remaining fraction due to photochemical loss  $(1 - f(r, t'))$ , and the transit time distribution  $G(r, t)$  or age spectrum  $G(r, t')$ , which is a function of transit time  $t'$  and the location in the stratosphere  $r$ . The transit time distribution is also often referred to as the “age spectrum” because it is a probability density function of the age of each fluid element in the air parcel since it entered the stratosphere. As explained in Sect. 2,  $G$  and  $f$  are not functions of time  $t$  as stratospheric transport is assumed to be stationary in time.

All of the three functions depend on transit time  $t'$ :

$$\chi_{strat}(r, t) = \int_0^{\infty} \chi_{trop}(t - t') (1 - f(r, t')) G(r, t') dt'. \quad (7)$$

Physically Eq. (7) describes that the observed mixing ratio of a CAS will be the sum over the mixing ratios of the individual fluid elements with different transit times, different photochemical loss and different original mixing ratios upon entry into the

stratosphere. For short lived species, the fluid elements with long transit times will contribute very little to the observed mixing ratio in the stratosphere, as the original content has been photochemically depleted. The tropospheric mixing ratio at that time is thus not very relevant for the observed mixing ratio. Imagine that a CAS has a decreasing trend in the troposphere and that its fractional loss will be nearly complete after a transit time of a 4 years. The age spectrum describes both residual circulation and mixing.

The mixing ratio of an inert tracer in the stratosphere can then be calculated by the convolution of the age spectrum and the tropospheric time series  $\chi_{trop}$ , which describes the changing abundances of the tracer in the troposphere that propagate into the stratosphere. Hence, we receive observed mixing ratio on the 4 year iso agesurface will then be dominated by the short fraction of the transit time distribution, whereas longer transit times must be weighted less heavily. The probability density function describing how strongly which transit time and thus the corresponding tropospheric mixing ratio must be weighted should thus be different for species with different chemical loss and in particular also different for species with chemical loss than for species without chemical loss.

In the case of an inert tracer,  $f(r, t') = 0$  for all possible transit times and transport pathways. Thus the loss term  $(1 - f(r, t'))$  disappears and the right hand side of Eq. (7) reduces to Eq. (5) for the determination of the entry mixing ratio, as discussed in Sect. 2. In this case the stratospheric mixing ratio  $\chi_{strat}$  is identical to the entry value, as there is no chemical breakdown.

This equation will be valid throughout the stratosphere only for an inert tracer. For CAS we also need to take into account that the tracer will be depleted during its propagation through the loss regions. Using a 2D chemical transport model, Plumb et al. (1999) showed that the chemical loss modifies the transit time distribution for each CAS in a different way. Strongest modifications were calculated for the species with shortest stratospheric lifetimes. However, only if  $f$  were constant for all fluid elements reaching point  $r$  and independent of transit time  $t'$  thus  $f = f(r)$  instead of  $f(r, t')$ , the factor  $(1 - f(r))$  could be extracted from the integral, yielding

$$\chi_{strat}(r, t) = (1 - f(r)) \int_0^{\infty} \chi_{trop}(t - t') G(r, t') dt', \quad (8)$$

which can be rearranged to Eq. (6), which is the form of Eq. (1) used for the calculation of the fractional release factor according to Newman et al. (2007) As shown here, this formulation depends upon the assumption that fractional release for all fluid elements reaching point  $r$  is similar for all transit times  $t'$ , which is clearly not a valid assumption.

In order to derive a new formulation of FRF with better correction for tropospheric trends, we again take a look at the loss term in Eq. (7).  $(1 - f(r, t'))$  describes the loss as a function of transit time  $t'$ . In general, the fraction of a species which has been released from its source gas will increase with time depend both on the transit time  $t'$  and the transport pathway the air parcel has taken. However, on average  $f$  will increase the longer an air parcel has stayed in the stratosphere, especially the time spent in the loss region. For simplicity we therefore assume that FRF  $f$  will only be a function of the time spent in the stratosphere and not on the pathway. The different fractional losses for different pathways are ignored in this approach, following the “average lagrangian path” concept proposed by Schoeberl et al. (2005).

As shown in Eq. , the stratospheric mixing ratio of a CAS can then be expressed in the following way-

$$\chi_{strat}(r, t) = \int_0^{\infty} \chi_{trop}(t - t') (1 - f(t')) G(r, t') dt'.$$

Within this formulation of the stratospheric mixing ratio Assuming that  $f$  will only depend on the transit time  $t'$ , we can define a new loss weighted distribution function  $G^*$ , which combines  $G$  with the chemical loss term  $(1 - f(t')) \div (1 - f(r, t'))$ :

$$5 \quad G^*(r, t') \equiv \left(1 - f(r, t')\right) G(r, t'). \quad (9)$$

We Following Plumb et al. (1999), we will refer to  $G^*$  as the arrival time distribution, as it represents the distribution of arrival times of molecules, which have not been photochemically degraded.

The arrival time distribution  $G^*$  is only normalized for inert tracers without chemical loss. In this case, the loss term  $f(t')$   $f(r, t')$  disappears in Eq. (9) and the arrival time distribution coincides with the age spectrum  $G^* = G$ .

10 In general it  $G^*$  satisfies the relation

$$\int_0^{\infty} G^*(r, t') dt' \leq 1. \quad (10)$$

For this reason we define a normalized arrival time distribution  $G_N^*$  by normalizing  $G^*$

$$G_N^*(r, t') = \frac{G^*(r, t')}{\int_0^{\infty} G^*(r, t') dt'} \quad (11)$$

so that

$$15 \quad \int_0^{\infty} G_N^*(r, t') dt' = 1 \quad (12)$$

with a corresponding mean arrival time  $\Gamma^*$  that can be calculated from the first moment of  $G_N^*$

$$\Gamma^*(r) = \int_0^{\infty} t' G_N^*(r, t') dt'. \quad (13)$$

We now solve the integral over  $G^*$

$$\int_0^{\infty} G^*(r, t') dt' = \int_0^{\infty} \left(1 - f(r, t')\right) G(r, t') dt' = \int_0^{\infty} G(r, t') dt' - \int_0^{\infty} f(r, t') G(r, t') dt' = 1 - \bar{f}(r) \quad (14)$$

20 with  $\bar{f}$  being the first moment of the probability density function of all fractional releases, thus the arithmetic mean or average fractional release -

$$\bar{f}(r) \equiv \int_0^{\infty} f(r, t') G(r, t') dt'. \quad (15)$$

Replacing the integral in (11) with (14) yields

$$G_N^*(r, t') = \frac{G^*(r, t')}{(1 - \bar{f})} \frac{G^*(r, t')}{(1 - \bar{f}(r))}. \quad (16)$$

Solving (16) for  $G^*$  and inserting this relation into (9) yields

$$G_N^*(r, t') \left(1 - \bar{f}(r)\right) = \left(1 - f(r, t')\right) G(r, t'), \quad (17)$$

5 and inserting in yields (7) yields

$$\chi_{strat}(r, t) = \int_0^\infty \chi_{trop}(t - t') \left(1 - \bar{f}(r)\right) G_N^*(r, t') dt' = \left(1 - \bar{f}(r)\right) \int_0^\infty \chi_{trop}(t - t') G_N^*(r, t') dt'. \quad (18)$$

Note that in this formulation  $\bar{f}$  is a constant  $\bar{f}(r)$  does not depend on transit time  $t'$  and can thus be extracted from the integral.

From this equation we can now calculate the mixing ratio of a chemical active tracer at any location and time in the stratosphere. Presupposed that as long as the tropospheric time series, the FRF new average FRF  $\bar{f}$  and the arrival time distribution are known. The other way around it is possible to infer steady state FRFs  $\bar{f}$  from Eq. (18).

This can be done by simply rearranging Eq. (18) and solving for  $\bar{f}$

$$\bar{f}(r) = \frac{\int_0^\infty \chi_{trop}(t - t') G_N^*(r, t') dt' - \chi_{strat}(r, t)}{\int_0^\infty \chi_{trop}(t - t') G_N^*(r, t') dt'}. \quad (19)$$

We interpret  $\bar{f}$  as the mean fractional release factor on a given age isosurface. It corresponds to a quasi steady state value. Of course, FRF still depends on the mean age of air, which gives information on how long the air parcel is already located has already spent in the stratosphere. In addition, by using the The new mean fractional release factor  $\bar{f}$  should be independent of tropospheric trends and is only expected to change if stratospheric transport or photochemistry change. Eq. (19) is similar to Eq. (6), suggested by Newman et al. (2007), but  $G$  has been replaced by the normalized arrival time distribution, the effect of chemical loss is taken into account.  $G_N^*$ . Note that for a species without tropospheric trend, Eq. (6) and Eq. (19) will give the identical result, as the integrals will yield the constant tropospheric mixing ratios.

20 The calculation of this expression requires the knowledge of the The entry mixing ratio in this new formulation

$$\chi_{entry}(r, t) = \int_0^\infty \chi_{trop}(t - t') G_N^*(r, t') dt' \quad (20)$$

now takes into account transport as well as chemical loss processes. Using  $G_N^*$  instead of  $G$  results in a lesser weighting of the tail of the transit time distribution which is reasonable, especially for CAS with short lifetimes. A shorter-lived species is almost completely depleted after a transit time of e.g. 4 years thus this transit time  $t'$  should not contribute in the convolution with the tropospheric time series when calculating the remaining organic fraction. For such shorter lived species the remaining amount in the original organic form is thus hardly influenced by the tropospheric mixing ratios of air which entered a long time ago (the "tail" of the age spectrum for an inert trace gas). The shorter lived the trace gas is, the more the weighting needs to be

shifted to the short fraction of the age spectrum. The arrival time distribution describes the relevant weighting of the different transit times and is specific for each trace gas.

A complication is of course that the normalized arrival time distribution  $G_N^*(r, t)$  ~~needs to be known in order to solve Eq. (19).~~ This arrival time distribution has been calculated from a 2D chemical transport model by Plumb et al. (1999).

5 Following Plumb et al. (1999), we call the first moment of this distribution the “mean arrival time”  $\Gamma^*$  which takes into account the chemical loss of the species. A possible parameterization of  $\Gamma^*$  was described by Plumb et al. (1999). ~~It was received from a normalization scheme within a 2-D chemical transport model.~~  $\Gamma^*$  is a substance specific quantity and depends on mean age and the stratospheric lifetime of the tracers. In the following section we test the new formulation of FRF  $\bar{f}$  given in Eq. (19) by applying it to EMAC model data. We compare the results to the current formulation of FRF  $f$ , based on Eq. (6).

## 10 6 Results of the new formulation

~~To use the FRF in the calculation of ODP and EESC a trend independent formulation is necessary. Thus we~~ In the last section a new formulation of FRF has been derived which should be able to correct the effect of tropospheric trends when calculating FRF. We apply our new formulation Eq. (19) which ~~includes~~ takes into account effects of chemical loss to the same data set as for the analysis of the current FRF formulation presented in Sect. 4. This means we examine the temporal evolution of FRF on the same latitude band and age of air isosurfaces ~~again using both idealized and realistic tracers.~~

To solve Eq. (19) it is necessary to find a good description of  $G_N^*$ . ~~A parameterization of the first moment of the distribution is given by Plumb et al. (1999).~~ We choose  $G_N^*$  to have the same shape as  $G$ , i.e. an inverse Gaussian distribution but with the parameters  $\Gamma^*$  (first moment) and  $\Delta^*$  (second moment), so that  $G_N^* = G(\Gamma^*, \Delta^*, t')$ . Like for  $G$  we use a constant ratio of the squared width to mean age of  $\Delta^{*2}/\Gamma^* = 0.7$  yr.

20 Plumb et al. (1999) derived a parameterization of a species dependent “mean arrival time”  $\Gamma^*$  for a wide range of ~~species and in addition as a function of the stratospheric lifetime.~~ With chemically active species from a delta pulse emission calculation.  $\Gamma^*$  can be calculated from the mean age of air  $\Gamma$  and the mean stratospheric lifetime  $\tau$  by a parameterization scheme (Plumb et al., 1999). Using  $\Gamma^*$  instead of  $\Gamma$  takes respect to the ~~shape of the distribution we have chosen to use the same shape as for  $G$ , i.e. an inverse Gaussian distribution with the width  $\Delta$  of  $\Delta^2/\Gamma = 0.7$  yr~~ chemical loss occurring on the transport pathways. We computed  $\Gamma^*$  for the considered species and applied it as the first moment of our new arrival time distribution  $G_N^*$ .

The result of the new calculation of FRF according to Eq. (19) can be seen in Fig. 4. We clearly notice the improvement of the new calculation method. The tropospheric trend of the species is almost corrected for and FRF values for the idealized and the realistic tracers show a much better agreement.

In contrast to the current formulation (cf. Fig. 3), FRF is slightly overestimated compared to the idealized tracer in times of positive trends for CFC-12 ( $\text{CF}_2\text{Cl}_2$ ) and methyl chloroform ( $\text{CH}_3\text{CCl}_3$ ). For CFC-11 ( $\text{CFCl}_3$ ), the FRF according to the new formulation is somewhat underestimated on the 2 and 3 yr age isosurface but fits the idealized tracer well on the 4yr age isosurface. Furthermore, the FRF of methyl chloroform is underestimated when tropospheric mixing ratios are declining. The reason for this feature is a too large correction between  $\Gamma$  and  $\Gamma^*$ .

As we would expect, the fractional release of  $\text{N}_2\text{O}$  is nearly unaffected by the new calculation method, because of its small tropospheric trend. For CFC-11 and CFC-12 there are still small deviations between the realistic and the idealized tracer but the steady state value is reached much earlier than in the current formulation and overall the differences are much smaller. Indeed, we do expect species and age dependent differences in the results, as the same parameterization is used to derive  $\Gamma^*$  from  $\Gamma$  for all mean age values and different parameters are used for different species.

The largest change can be seen for methyl chloroform, which is the analyzed substance with the largest variation in the tropospheric trend. The realistic tracer now approaches the idealized tracer and we can see the improvement especially for the highest considered age isosurface ( $\Gamma = 4$  yr) in comparison to the current formulation of FRF used in Fig. 3.

To sum up, we conclude that including chemical loss into the calculation reduces the time-dependence of the FRF value substantially. The parameterization of loss was adopted from Plumb et al. (1999) who derived the parameterization from a simple 2D model. It could still be improved to obtain an even better adaption to the idealized tracer. Besides this, we also kept an inverse Gaussian distribution with a similar parameterization as for mean age, which might not be the optimal choice for the new arrival time distribution.

## 7 Summary and discussion

In this paper we presented a study on fractional release factors (FRF) and their time-dependence. We analyzed the temporal evolution of FRF between 1965 and 2011 for the halocarbons CFC-11, CFC-12 and methyl chloroform, as well as for nitrous oxide. FRF is often treated to be a steady state quantity, which is a necessary assumption to use it in the calculation of ODP and EESC. In the current formulation of FRF, the transit time distribution and the tropospheric time series of the substances are taken into account, but the coupling between trends, chemical loss and transit time distribution is not included.

For chemical active species, the fraction of the air with very long transit times (the “tail” of the transit time distribution) will have passed the chemical loss region and therefore only contributes very little to the remaining organic fraction, but is to a large degree in the inorganic form. On the other hand, the fraction of the air with short transit times will be to a large degree still in the form of the organic source gas, as it has not been transported to the chemical loss region. This must be taken into account when folding the transit time distribution with the tropospheric time series to derive the fraction still residing in the organic (source) form. For this we used an arrival time distribution, based on the concept and parameterization suggested by Plumb et al. (1999).

We applied the two FRF calculation methods (current and new) on EMAC model data and studied the differences. For both methods we used exemplarily (but without loss of generality) zonally averaged monthly mean stratospheric mixing ratios in a latitude band between  $32^\circ$  N and  $51^\circ$  N.

A special feature of the used model simulation are the implemented idealized tracers with nearly constant tropospheric mixing ratios. We showed that the use of the new formulation of the propagation of chemical active species with tropospheric trends into the stratosphere results in FRF values, which are to a large degree independent of the tropospheric trend of the

respective trace gas and thus gives a quasi steady state value of FRF. This is shown by a much better agreement with the FRF of the idealized tracers, which have no tropospheric trend.

In contrast, the classical approach yields FRF values that depend on tropospheric trends, which change with time. This might be an explanation for the discrepancies between FRF values deduced from observations at different dates. The reason for the non steady behavior is obviously based on an incomplete trend correction. In times of strong tropospheric trends, the realistic tracers deviate most from the idealized tracers. On the other hand, the FRF of the realistic N<sub>2</sub>O tracer hardly differs from the idealized tracer, because it has a very small tropospheric trend.

This may lead to discrepancies in fractional release factors derived during different time periods. Such differences in FRF have been observed between the work of Laube et al. (2013) and Newman et al. (2007). The FRF values derived by Laube et al. (2013) were lower than those derived by Newman et al. (2007) on the 3 year mean age isosurface. As the tropospheric trends were lower during the observations used by Laube et al. (2013), it is expected that the re-calculation using our method should even increase the observed difference. We therefore conclude that the calculation of mean age may be the reason for the observed discrepancies, as suggested by Laube et al. (2013).

We also acknowledge that the new formulation is less intuitive than the formulation used by Newman et al. (2007) and Laube et al. (2013). However, as we have shown that the method used by Laube et al. (2013) and Newman et al. (2007) yields values which are strongly influenced by the tropospheric trend, this loss of intuitivity and the added dependence on model information is necessary, as much more representative values are derived.

To include chemical loss into the transit time distribution, we applied the parameterization described by Plumb et al. (1999). Using the new formulation of the stratospheric mixing ratio (with loss) we constructed a new expression of the FRF and validated it with EMAC data.

The newly calculated FRF values fit well to the results of the idealized steady state tracers and the influence of the tropospheric trend can almost completely be corrected. This is remarkable, because we have to keep in mind that the parameterization was derived from a completely different and independent 2D model and that we used the same shape parameters as for the classical age spectrum.

Our new method produces FRF values which are far less dependent on tropospheric trends. In the case of small tropospheric trends the results will converge with those using the current formulation and also with those for idealized tracers without any trends. On the other hand, more model information is needed for the derivation of the FRF values, as species dependent arrival time distributions need to be applied. The parameterisation given by Plumb et al. (1999) depends on the stratospheric lifetime of the species. As fractional release also depends on the lifetime, one may argue that there is a certain circular argumentation involved. Indeed, if the assumption on stratospheric lifetime is very far off, and tropospheric trends are large then our new method will also fail in correcting for the tropospheric trend. However, it should be noted that the calculation is not extremely sensitive to the assumed lifetime. We investigated the sensitivity for a CFC-12 like tracer with a linearly increasing trend of 5 % per year. For an assumed steady state FRF of 0.5 at a mean age of 4 years using our method, a value of 0.5 is found with a deviation of 0.5 % for an uncertainty in the assumed lifetime of 20 %. Using the current method ignoring the effect of chemical



loss would result in an FRF of 0.45, i.e. 10 % lower than the correct value. The sensitivity to the assumed lifetime is thus rather small.

We suggest to use the new formulation and reassess former FRF data. Especially FRF values calculated from observations at times of strong tropospheric trends will profit from the new calculation method. Many fully halogenated CFCs showed strong trends prior to 1990, while many HCFCs still show very strong positive trends. This implies that FRF values currently used for HCFCs are likely to be underestimated, which would lead to an underestimation of their ODP values.

We suggest that this new method should be refined by calculating the arrival time distributions in state-of-the-art models and deriving parameterizations from these models. These new methods should be tested by including idealized tracers in the same models and subsequently be applied to observations, which have been used to derive FRF values. Using these new FRF values, a reassessment of ODP values for halogenated source gases and also a re-evaluation of temporal trends of EESC are necessary.

*Acknowledgements.* This work was supported by the DFG Research Unit 1095 (SHARP) under project number EM367/9-1 and EN367/9-2. We thank all partners of the Earth System Chemistry integrated Modelling (ESCiMo) initiative for their support. The model simulations have been performed at the German Climate Computing Centre (DKRZ) through support from the Bundesministerium für Bildung und Forschung (BMBF). DKRZ and its scientific steering committee are gratefully acknowledged for providing the HPC and data archiving resources for this consortial project ESCiMo.

## References

- Albritton, D. L., Watson, R., and Aucamp, P.: Scientific assessment of ozone depletion: 1994, 1995.
- Bönisch, H., Engel, A., Curtius, J., Birner, T., and Hoor, P.: Quantifying transport into the lowermost stratosphere using simultaneous in-situ measurements of SF<sub>6</sub> and CO<sub>2</sub>, *Atmospheric Chemistry and Physics*, 9, 5905–5919, doi:10.5194/acp-9-5905-2009, <http://www.atmos-chem-phys.net/9/5905/2009/>, 2009.
- Butchart, N., Cionni, I., Eyring, V., Shepherd, T. G., Waugh, D. W., Akiyoshi, H., Austin, J., Brühl, C., Chipperfield, M. P., Cordero, E., Dameris, M., Deckert, R., Dhomse, S., Frith, S. M., Garcia, R. R., Gettelman, A., Giorgetta, M. A., Kinnison, D. E., Li, F., Mancini, E., McLandress, C., Pawson, S., Pitari, G., Plummer, D. A., Rozanov, E., Sassi, F., Scinocca, J. F., Shibata, K., Steil, B., and Tian, W.: Chemistry–Climate Model Simulations of Twenty-First Century Stratospheric Climate and Circulation Changes, *Journal of Climate*, 23, 5349–5374, doi:10.1175/2010JCLI3404.1, <http://dx.doi.org/10.1175/2010JCLI3404.1>, 2010.
- Carpenter, L. J., Reimann, S., Burkholder, J. B., Clerbaux, C., Hall, B. D., Hossaini, R., Laube, J. C., Yvon-Lewis, S. A., Engel, A., Montzka, S., et al.: Update on ozone-depleting substances (ODSs) and other gases of interest to the Montreal protocol, *Scientific Assessment of Ozone Depletion: 2014*, pp. 1–1, 2014.
- Engel, A., Strunk, M., Müller, M., Haase, H.-P., Poss, C., Levin, I., and Schmidt, U.: Temporal development of total chlorine in the high-latitude stratosphere based on reference distributions of mean age derived from CO<sub>2</sub> and SF<sub>6</sub>, *Journal of Geophysical Research: Atmospheres*, 107, ACH 1–1–ACH 1–11, doi:10.1029/2001JD000584, <http://dx.doi.org/10.1029/2001JD000584>, 2002.
- Engel, A., Möbius, T., Bönisch, H., Schmidt, U., Heinz, R., Levin, I., Atlas, E., Aoki, S., Nakazawa, T., Sugawara, S., et al.: Age of stratospheric air unchanged within uncertainties over the past 30 years, *Nature Geoscience*, 2, 28–31, 2009.
- Gammon, R., Wofsy, S., Cicerone, R., Delany, A., Harriss, R., Khalil, M., Logan, J., Midgley, P., and Prather, M.: Tropospheric trace gases, in: *In Atmospheric Ozone 1985. Assessment of our Understanding of the Processes Controlling its Present Distribution and Change*, Volume 1 62 p (SEE N87-10612 01-46), vol. 1, 1985.
- Hall, T. M. and Plumb, R. A.: Age as a diagnostic of stratospheric transport, *Journal of Geophysical Research: Atmospheres*, 99, 1059–1070, 1994.
- Jöckel, P., Tost, H., Pozzer, A., Brühl, C., Buchholz, J., Ganzeveld, L., Hoor, P., Kerkweg, A., Lawrence, M., Sander, R., Steil, B., Stiller, G., Tanarhte, M., Taraborrelli, D., van Aardenne, J., and Lelieveld, J.: The atmospheric chemistry general circulation model ECHAM5/MESSy1: consistent simulation of ozone from the surface to the mesosphere, *Atmospheric Chemistry and Physics*, 6, 5067–5104, doi:10.5194/acp-6-5067-2006, <http://www.atmos-chem-phys.net/6/5067/2006/>, 2006.
- Jöckel, P., Tost, H., Pozzer, A., Kunze, M., Kirner, O., Brenninkmeijer, C. A. M., Brinkop, S., Cai, D. S., Dyroff, C., Eckstein, J., Frank, F., Garny, H., Gottschaldt, K.-D., Graf, P., Grewe, V., Kerkweg, A., Kern, B., Matthes, S., Mertens, M., Meul, S., Neumaier, M., Nützel, M., Oberländer-Hayn, S., Ruhnke, R., Runde, T., Sander, R., Scharffe, D., and Zahn, A.: Earth System Chemistry integrated Modelling (ESCiMo) with the Modular Earth Submodel System (MESSy) version 2.5.1, *Geoscientific Model Development*, 9, 1153–1200, doi:10.5194/gmd-9-1153-2016, <http://www.geosci-model-dev.net/9/1153/2016/>, 2016.
- Ko, M., Newman, P., Reimann, S., Strahan, S., Plumb, R., Stolarski, R., Burkholder, J., Mellouki, W., Engel, A., Atlas, E., et al.: Lifetimes of stratospheric ozone-depleting substances, their replacements, and related species, *SPARC Report*, 2013.
- Laube, J. C., Engel, A., Bönisch, H., Möbius, T., Sturges, W. T., Braß, M., and Röckmann, T.: Fractional release factors of long-lived halogenated organic compounds in the tropical stratosphere, *Atmospheric Chemistry and Physics*, 10, 1093–1103, doi:10.5194/acp-10-1093-2010, <http://www.atmos-chem-phys.net/10/1093/2010/>, 2010.

- Laube, J. C., Keil, A., Bönisch, H., Engel, A., Röckmann, T., Volk, C. M., and Sturges, W. T.: Observation-based assessment of stratospheric fractional release, lifetimes, and ozone depletion potentials of ten important source gases, *Atmospheric Chemistry and Physics*, 13, 2779–2791, doi:10.5194/acp-13-2779-2013, <http://www.atmos-chem-phys.net/13/2779/2013/>, 2013.
- Li, F., Waugh, D. W., Douglass, A. R., Newman, P. A., Strahan, S. E., Ma, J., Nielsen, J. E., and Liang, Q.: Long-term changes in stratospheric age spectra in the 21st century in the Goddard Earth Observing System Chemistry-Climate Model (GEOSCCM), *Journal of Geophysical Research: Atmospheres*, 117, 2012.
- Meinshausen, M., Smith, S. J., Calvin, K., Daniel, J. S., Kainuma, M. L. T., Lamarque, J.-F., Matsumoto, K., Montzka, S. A., Raper, S. C. B., Riahi, K., Thomson, A., Velders, G. J. M., and van Vuuren, D. P.: The RCP greenhouse gas concentrations and their extensions from 1765 to 2300, *Climatic Change*, 109, 213–241, doi:10.1007/s10584-011-0156-z, <http://dx.doi.org/10.1007/s10584-011-0156-z>, 2011.
- 10 Newman, P. A., Daniel, J. S., Waugh, D. W., and Nash, E. R.: A new formulation of equivalent effective stratospheric chlorine (EESC), *Atmospheric Chemistry and Physics*, 7, 4537–4552, doi:10.5194/acp-7-4537-2007, <http://www.atmos-chem-phys.net/7/4537/2007/>, 2007.
- Plumb, I. C., Vohralik, P. F., and Ryan, K. R.: Normalization of correlations for atmospheric species with chemical loss, *Journal of Geophysical Research: Atmospheres*, 104, 11 723–11 732, doi:10.1029/1999JD900014, <http://dx.doi.org/10.1029/1999JD900014>, 1999.
- Roeckner, E., Brokopf, R., Esch, M., Giorgetta, M., Hagemann, S., Kornblueh, L., Manzini, E., Schlese, U., and Schulzweida, U.: Sensitivity of simulated climate to horizontal and vertical resolution in the ECHAM5 atmosphere model, *J. Clim.*, 19, 3771–3791, 2006.
- 15 Sander, R., Baumgaertner, A., Gromov, S., Harder, H., Jöckel, P., Kerkweg, A., Kubistin, D., Regelin, E., Riede, H., Sandu, A., Taraborrelli, D., Tost, H., and Xie, Z.-Q.: The atmospheric chemistry box model CAABA/MECCA-3.0, *Geoscientific Model Development*, 4, 373–380, doi:10.5194/gmd-4-373-2011, <http://www.geosci-model-dev.net/4/373/2011/>, 2011.
- Sander, R., Jöckel, P., Kirner, O., Kunert, A. T., Landgraf, J., and Pozzer, A.: The photolysis module JVAL-14, compatible with the MESSy standard, and the JVal PreProcessor (JVPP), *Geoscientific Model Development*, 7, 2653–2662, doi:10.5194/gmd-7-2653-2014, <http://www.geosci-model-dev.net/7/2653/2014/>, 2014.
- 20 Schaufli, S. M., Atlas, E. L., Donnelly, S. G., Andrews, A., Montzka, S. A., Elkins, J. W., Hurst, D. F., Romashkin, P. A., Dutton, G. S., and Stroud, V.: Chlorine budget and partitioning during the Stratospheric Aerosol and Gas Experiment (SAGE) III Ozone Loss and Validation Experiment (SOLVE), *Journal of Geophysical Research: Atmospheres*, 108, n/a–n/a, doi:10.1029/2001JD002040, <http://dx.doi.org/10.1029/2001JD002040>, 4173, 2003.
- 25 Schmidt, U. and Khedin, A.: In situ measurements of carbon dioxide in the winter Arctic vortex and at midlatitudes: An indicator of the ‘age’ of stratospheric air, *Geophysical Research Letters*, 18, 763–766, 1991.
- Schoeberl, M. R., Douglass, A. R., Polansky, B., Boone, C., Walker, K. A., and Bernath, P.: Estimation of stratospheric age spectrum from chemical tracers, *Journal of Geophysical Research: Atmospheres*, 110, n/a–n/a, doi:10.1029/2005JD006125, <http://dx.doi.org/10.1029/2005JD006125>, d21303, 2005.
- 30 Solomon, S.: Progress towards a quantitative understanding of Antarctic ozone depletion, *Nature*, 347, 347–354, 1990.
- Solomon, S. and Albritton, D. L.: Time-dependent ozone depletion potentials for short-and long-term forecasts, *Nature*, 357, 33–37, 1992.
- Solomon, S., Mills, M., Heidt, L. E., Pollock, W. H., and Tuck, A. F.: On the evaluation of ozone depletion potentials, *Journal of Geophysical Research: Atmospheres*, 97, 825–842, doi:10.1029/91JD02613, <http://dx.doi.org/10.1029/91JD02613>, 1992.
- 35 Strunk, M., Engel, A., Schmidt, U., Volk, C., Wetter, T., Levin, I., and Glatzel-Mattheier, H.: CO<sub>2</sub> and SF<sub>6</sub> as stratospheric age tracers: Consistency and the effect of mesospheric SF<sub>6</sub>-loss, *Geophysical research letters*, 27, 341–344, 2000.
- Waugh, D. and Hall, T.: AGE OF STRATOSPHERIC AIR: THEORY, OBSERVATIONS, AND MODELS, *Reviews of Geophysics*, 40, 1–1–1–26, doi:10.1029/2000RG000101, <http://dx.doi.org/10.1029/2000RG000101>, 1010, 2002.

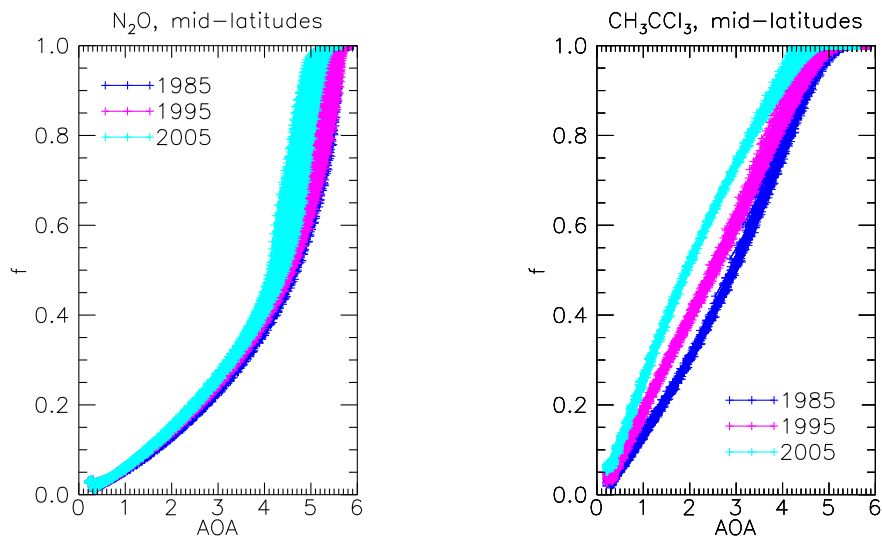

**Figure 1.** Fractional release ( $f$ ) as a function of mean age of air (AOA) in the mid-latitudes between  $32^\circ$  N and  $51^\circ$  N for nitrous oxide (left) and methyl chloroform (right) derived from monthly mean EMAC model data. The FRF was calculated by the current formulation for different dates. It can be observed that the correlations vary with time.

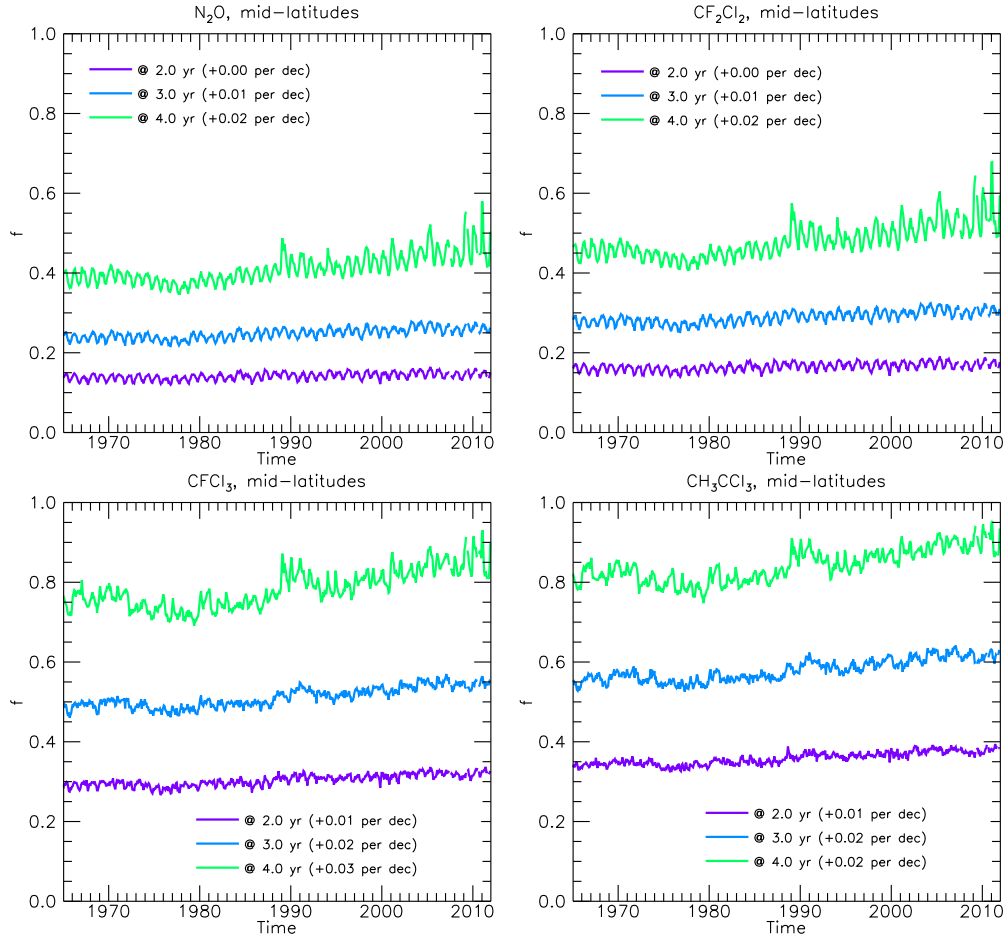

**Figure 2.** FRF calculated from the idealized tracers (without tropospheric trends) of the EMAC model in the mid-latitudes between  $32^\circ$  N and  $51^\circ$  N. The FRF is calculated on the 2 (purple), 3 (blue) and 4 yr (green) age isosurface. The absolute change of FRF per decade is noted in parentheses.

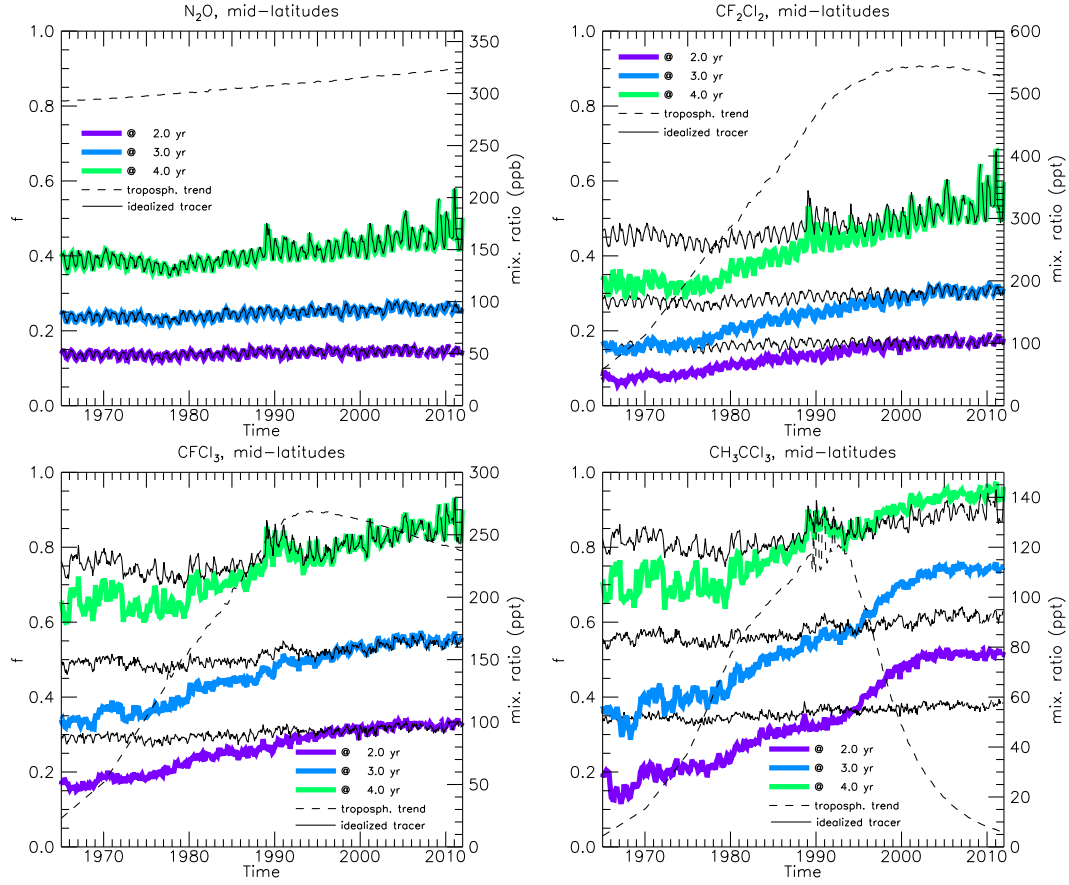

**Figure 3.** Temporal evolution of FRF calculated by the current formulation. Results for the realistic tracers are shown in color. The results for the idealized tracers (cf. Fig. 2) are shown as black lines for comparison. The related tropospheric trend of the species is plotted in dashed lines over the entire range in order to compare the magnitudes. There are obvious deviations between realistic and idealized tracers that depend on the tropospheric trends of the species (see text for explanation).

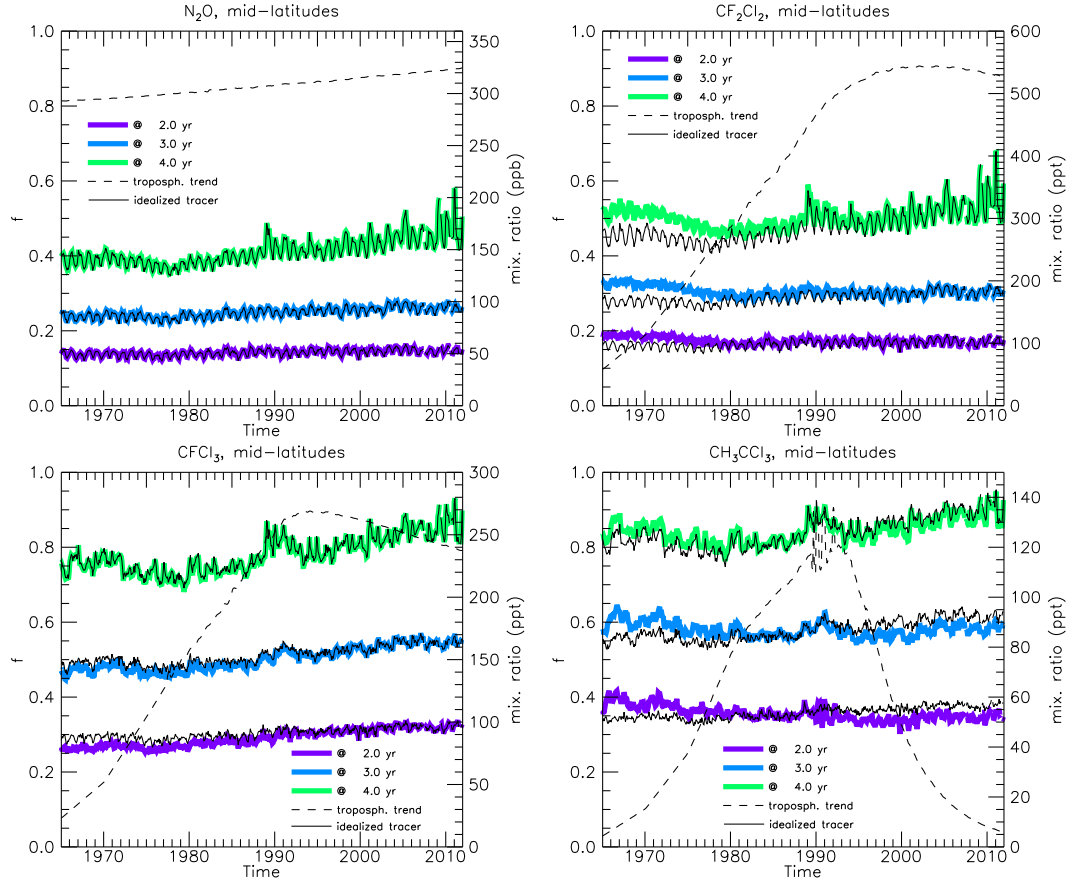

**Figure 4.** Temporal evolution of FRF calculated by the new formulation, taking into account chemical loss. The results of the realistic tracers are shown in color on different age isosurfaces. The results of the idealized tracers are shown in solid black lines whereas the tropospheric trend is plotted in dashed lines. We find a much better agreement between idealized and realistic tracers compared to the current formulation of FRF (cf. Fig. 3).
